# Supplementary material for: Children on the move in Europe: a narrative review of the evidence on the health risks, health needs and health policy for asylum seeking, refugee and undocumented children
Source: PubMed Central journal article supplement — BMJ Paediatr Open. 2019 Jan 31;3(1):bmjpo-2018-000364. doi: 10.1136/bmjpo-2018-000364 (PMC6361329; doi:10.1136/bmjpo-2018-000364), 2019-01-31
Supplement: bmjpo-2018-000364.draft_revisions.pdf [file bmjpo-2018-000364.draft_revisions.pdf]

# BMJ Paediatrics Open

BMJ Paediatrics Open is committed to open peer review. As part of this commitment we make the peer review history of every article we publish publicly available.

When an article is published we post the peer reviewers' comments and the authors' responses online. We also post the versions of the paper that were used during peer review. These are the versions that the peer review comments apply to.

The versions of the paper that follow are the versions that were submitted during the peer review process. They are not the versions of record or the final published versions. They should not be cited or distributed as the published version of this manuscript.

BMJ Paediatrics Open is an open access journal and the full, final, typeset and author-corrected version of record of the manuscript is available on our site with no access controls, subscription charges or pay-per-view fees (<http://bmjpaedsopen.bmj.com>).

If you have any questions on BMJ Paediatrics Open's open peer review process please email [info.bmjpo@bmj.com](mailto:info.bmjpo@bmj.com)

# BMJ Paediatrics Open

## Migrant Child Health in Europe: A review of the evidence on asylum seeking, refugee and undocumented children

|                               |                                                                                                                                                                                                                                                                                                                                                                              |
|-------------------------------|------------------------------------------------------------------------------------------------------------------------------------------------------------------------------------------------------------------------------------------------------------------------------------------------------------------------------------------------------------------------------|
| Journal:                      | <i>BMJ Paediatrics Open</i>                                                                                                                                                                                                                                                                                                                                                  |
| Manuscript ID                 | bmjpo-2018-000364                                                                                                                                                                                                                                                                                                                                                            |
| Article Type:                 | Original article                                                                                                                                                                                                                                                                                                                                                             |
| Date Submitted by the Author: | 24-Aug-2018                                                                                                                                                                                                                                                                                                                                                                  |
| Complete List of Authors:     | Kadir, Ayesha; Malmo Hogskola, Malmö Institute for Studies of Migration, Diversity and Welfare<br>Battersby, Anna; Kaleidoscope Centre for Children and Young People, Lewisham and Greenwich NHS Trust, London<br>Spencer, Nick; University of Warwick Warwick Medical School, Division of Mental Health and Wellbeing<br>Hjern, Anders; Centre for Health Equity Studies, ; |
| Keywords:                     | Children's Rights, General Paediatrics                                                                                                                                                                                                                                                                                                                                       |
|                               |                                                                                                                                                                                                                                                                                                                                                                              |

SCHOLARONE™  
Manuscripts

1  
2  
3 **Migrant Child Health in Europe: A review of the evidence on asylum seeking, refugee and**  
4 **undocumented children**  
5  
6  
7  
8

9 Ayesha Kadir\*, Anna Battersby, Nick Spencer, Anders Hjern  
10

11  
12  
13 Ayesha Kadir

14 Institute for Studies of Migration, Diversity and Welfare  
15 Malmö University  
16 Niagara  
17 205 06 Malmö  
18 Sweden  
19 [ayesha.kadir@mau.se](mailto:ayesha.kadir@mau.se).  
20  
21 Tel: +45 53 45 85 62  
22

23  
24 Anna Battersby

25 Kaleidoscope Centre for Children and Young People  
26 Lewisham and Greenwich NHS Trust  
27 London  
28 UK  
29

30  
31  
32 Nick Spencer

33 Emeritus Professor of Child Health  
34 Division of Mental Health and Wellbeing  
35 Warwick Medical School, University of Warwick,  
36 Coventry CV4 9JD  
37 UK  
38  
39

40 Anders Hjern

41 Clinical Epidemiology,  
42 Department of Medicine,  
43 Karolinska Institutet and Centre for Health Equity Studies (CHESS), Karolinska  
44 Institutet/Stockholm University.  
45 Stockholm,  
46 Sweden  
47  
48  
49  
50

51 **Key words:** Child health, migration, child rights, social determinants of health  
52  
53  
54  
55  
56  
57  
58  
59  
60

## **Migrant Child Health in Europe: A review of the evidence on asylum seeking, refugee and undocumented children**

### **Abstract**

Forced displacement is a major child health issue. Between 2015 and 2017, more than 1 million asylum applications were made for children in Europe. Children on the move often make dangerous journeys, which may last for months or years. They are exposed to considerable health risks before, during and after their journey and they often have limited access to health care. In this review, we summarise the health risks and needs of asylum seeking, refugee and undocumented children in Europe during the first few months after their arrival and the ways in which European health policies respond to these risks and needs.

### **Introduction**

Globally, more than 13 million children live as refugees or asylum seekers outside their country of birth.(1) Among the mass migration of people to Europe since 2014, large numbers of children have made the journey, either with family or on their own, in search of safety, stability and a better future. Between 2015 and 2017, more than 1 million asylum applications were made for children in Europe.(2)

The phenomenon of migration to Europe has been characterised by continual evolution; with frequent changes in the most common migrant routes, modes of travel, and the length of stay in transit countries. Children making these dangerous and often prolonged journeys are exposed to considerable health risks. Migrant child health is related to their health status before the journey, conditions in transit (including experience of trauma) and after arrival in Europe, and is influenced by the health of their caregivers and their ability to access health care.(3)

The Convention on the Rights of the Child (CRC) affords all children with the right to health care without discrimination, and it devotes specific attention to the rights of displaced and unaccompanied children.(4) As such, the CRC provides a useful framework to address the health of migrant children. This paper reviews the health risks and needs of asylum seeking, refugee and undocumented children in Europe during the first few months after their arrival to a country (Table 1) and how European health policies respond to these risks and needs. It is important to note that children may live for months or years in one or several countries before settling, being repatriated, or going underground. Factors that begin to take precedence in the longer term, such as the social determinants of health, ethnicity, and

1  
2  
3 issues relating to legal status and prolonged periods of transit are outside of the scope of  
4 this article.  
5  
6  
7  
8

## 9 **Methods**

10  
11 The findings presented in this review are based on a comprehensive literature search of  
12 studies on migrant child health in Europe from 1 January 2007- 8 August 2017. Searches  
13 were run in PubMed and EMBASE on 8 August 2017. Search terms included combinations of  
14 terms for children such as “child”, “youth”, and “adolescent” with terms for migrant, such as  
15 “migrant”, “asylum seeker”, “refugee” and “undocumented migrant”, and with terms for  
16 countries in the European Union, Afghanistan, Jordan, Lebanon, Syria, and Turkey. The  
17 searches were limited to papers on children (birth-18 years) and English language. Papers  
18 were included if they addressed physical and mental health of migrant children, health  
19 examinations of migrant children, the effect of caregiver mental health on children, access  
20 to care, or disparities in care between migrant children and the local population. Non-  
21 English language papers, papers on adult populations (defined as papers with mean age of  
22 study population >18 years), and papers from non-European host countries were excluded.  
23 A total of 1517 titles were screened, 149 papers were eligible for full text review, of which  
24 33 were found to deal with the health needs and health risks of migrant children. These  
25 articles and another 29 articles and reports from hand searches are included in this review  
26 (Figure 1: Flow diagram).  
27  
28  
29  
30  
31  
32  
33  
34  
35  
36

## 37 **Health risks and needs of migrant children in Europe**

38  
39 The health needs of migrant children are highly heterogeneous, and depend on the  
40 conditions in the country of origin, during their journeys, and after arrival in the countries of  
41 destination. Children separated or travelling unaccompanied are particularly vulnerable to  
42 various forms of exploitation at all phases of their journey and after arrival. Structural,  
43 financial, language and cultural barriers in access to health care affect care-seeking  
44 behaviours at all phases of the journey, as well as diagnostic evaluation, treatment, and  
45 health outcomes (Table 2).(5)  
46  
47  
48  
49  
50  
51

## 52 *Communicable diseases*

53  
54 During travel and after arrival in Europe, children may be housed in overcrowded facilities  
55 with inadequate hygiene and sanitation conditions that place them at risk of communicable  
56 diseases. The most common infection sites include the respiratory tract, gastrointestinal  
57 tract and skin, with a concerning prevalence of parasitic and wound infections.(6-9)  
58  
59  
60

1  
2  
3 Migrant children need to complement their vaccinations to match the vaccination schedule  
4 of the country of destination.(10) Several studies of migrant children in Europe have  
5 identified low vaccination coverage against hepatitis B, measles, mumps, rubella and  
6 varicella and low immunity to vaccine preventable diseases including tetanus and  
7 diphtheria: this is coupled with a higher prevalence of previous exposure to vaccine-  
8 preventable diseases(11). Since 2015, cases of cutaneous diphtheria(10) and outbreaks of  
9 measles in the EU(12) have been attributed to insufficient vaccination coverage in migrant  
10 populations. Further, Hepatitis A cases have been reported in migrant children living in  
11 camps and centres in Greece and Germany, with particularly high rates among children  
12 under 15 years.(13, 14) However, it is important to note that there is no evidence of  
13 increased transmission of communicable diseases from migrants to host populations.(15)  
14  
15

16  
17  
18  
19 Migrant children originating from low and middle income countries may have been exposed  
20 to infectious agents that are rare in high income countries in Europe.(16-18) Furthermore,  
21 exposure to armed conflict may increase their risk of exposure to infections.(10) Notable  
22 infections among migrant populations include latent or active tuberculosis (TB),(16, 19)  
23 malaria,(10) HIV,(20) Hepatitis B and C,(10, 16), Syphilis(16), Human T-lymphotropic virus  
24 type 1 or 2,(16) louse-borne relapsing fever,(10, 21) shigella,(10) and leishmaniasis.  
25  
26  
27  
28

29 The treatment of migrant children with infectious diseases may require different regimens  
30 than those recommended by national protocols, as these children may be at higher risk of  
31 colonisation and infection with drug-resistant organisms. In Germany, routine screening  
32 practices at hospital admission have found that migrant children have higher rates of  
33 Multiple Drug Resistant (MDR) bacterial strains than the local population.(22) MDR  
34 Infections may be more difficult to treat, and carry higher morbidity and mortality risk.  
35  
36  
37  
38

### 39 *Noncommunicable diseases and injuries*

40  
41  
42 Displacement places children at risk for a broad variety of noncommunicable diseases and  
43 injuries that may be exacerbated by limited and irregular access to paediatric and neonatal  
44 health care. Paediatric groups that are particularly vulnerable include unaccompanied  
45 minors, pregnant adolescents, and infants.  
46  
47

48  
49 In 2017, more than half of the migrant children arriving in Europe were registered in Greece,  
50 and the largest age group were infants and small children (0-4years old),(23) Infants born  
51 during the journey may be born without adequate access to prenatal, intra-partum, or  
52 postnatal care, resulting in increased birth complications, stillbirth, and infant mortality.(24)  
53 Further, these newborns may have lacked access to screening for congenital disorders that  
54 is routinely offered in European countries. Infant nutrition may suffer, particularly as  
55 breastfeeding is a challenge for mothers during their journey.(25) The evidence regarding  
56 the risk of birth complications in children born to mothers after arrival in the destination  
57 country is mixed. Some studies in Europe have shown that these infants have higher rates of  
58  
59  
60

1  
2  
3 birth complications, including hypothermia, infections, low birth weight, pre-term birth, and  
4 perinatal mortality when compared with the native population,(8, 26) while other studies  
5 have found that outcomes in certain countries are similar to the national populations.(27)  
6 These patterns suggest that the cause of altered risks may be related to society-specific  
7 factors such as integration policies, socioeconomic disadvantage among different migrant  
8 groups, and barriers in access to care.(27)  
9  
10

11  
12 Traumatic events such as torture, sexual violence or kidnapping, may have long-lasting  
13 physical and psychological effects on a child. Physical trauma related to the journey and  
14 attempts at illegal border crossings may include skin lacerations, tendon lacerations,  
15 fractures, and muscle contusions. If left untreated and/or in unhygienic conditions, injuries  
16 may become infected, with severe and potentially life-threatening consequences.(6) People  
17 arriving by sea are particularly susceptible to injury and illness; a recent survey of rescue  
18 ships found that dehydration, and dermatological conditions associated with poor hygiene  
19 and crowded conditions were common, as well as new and old traumatic injuries from both  
20 violence and accidents.(28) The risk of female genital mutilation is high in girls from certain  
21 regions, and occurs to the extent that it is a recognised reason for seeking asylum.(29)  
22  
23  
24  
25  
26

27  
28 There is little good quality evidence from Europe on the risk of injury during the early period  
29 after arrival in the country of destination. However, a large Canadian study found that  
30 refugee children have an increased risk of injury after resettlement. The study reported a  
31 20% higher rate of unintentional injury in refugee youth compared with non-refugee  
32 immigrant youth for most causes of injury, with notably higher rates of motor vehicle  
33 injuries, poisonings, suffocation, and scald burns.(30) In spite of their risks before travel,  
34 during the journey, and after arrival, no studies provide data on the prevalence of disability  
35 in children on the move or its effect on child health and development.  
36  
37  
38  
39

40  
41 While the prevalence of noncommunicable chronic diseases in migrant children to the EU is  
42 not thought to differ significantly from host populations, there is little evidence to support  
43 this thinking, and barriers in access to care and different health beliefs pose challenges to  
44 diagnosing and managing migrant children with chronic diseases (Table 2).(31) Nutritional  
45 deficiencies and dental problems are more common in migrant children, with reported  
46 prevalence of iron deficiency anaemia ranging from 4-18% among children living in Germany  
47 and Greece.(7, 32) Dental problems are perhaps the most prevalent health issue in migrant  
48 children, and indeed have been reported in 22-65% of migrant and refugee children in the  
49 UK and Australia.(33)  
50  
51  
52  
53  
54

### 55 *Psychosocial and mental wellbeing*

56  
57 Migrant children are at high risk for psychosocial and mental health problems, with  
58 separated and unaccompanied children at highest risk. Direct and indirect exposure to  
59  
60

1  
2  
3 traumatic events are associated with post-traumatic stress disorder (PTSD), anxiety,  
4 depression, sleep disturbances, and a broad range of internalising and externalising  
5 behaviours in refugee children.(34)  
6  
7

8  
9 The mental health of caregivers, especially mothers, plays an important role in their  
10 children's mental and physical health. Maternal PTSD and depression are correlated with  
11 increased risk of PTSD, PTS symptoms, behavioural problems and somatic complaints in  
12 their children.(35) Conversely, good caregiver mental health is a protective factor for the  
13 mental and behavioural health of refugee children.(34)  
14  
15

16  
17 Transit and host country reception policies also impact migrant children's mental health  
18 outcomes. Numerous studies have documented that post-migration detention increases  
19 psychological symptoms and the prevalence of psychiatric illness in migrant children.(34)  
20 Detention, multiple relocations, prolonged asylum processes, and lack of child-friendly  
21 immigration procedures are associated with poor mental health outcomes in refugee  
22 children, and have been described in some studies as having placed the children in greater  
23 adverse situations than those which the children endured before migration.(34) A  
24 longitudinal study of refugee children from the Middle East in Denmark found that  
25 psychological symptoms improved over time, with risk factors related to war and  
26 persecution being important during the early years after arrival in Denmark, and social  
27 factors in the country of origin were more important for the long term.(36)  
28  
29  
30  
31  
32  
33

34 Racism and xenophobia play an important role in the psychological health and wellbeing of  
35 migrant children. Studies in Sweden and Denmark have found that the experience of  
36 discrimination is common among migrant youth and is associated with lower rates of social  
37 acceptance, poorer peer relations, and mental health problems.(37, 38) In a national survey  
38 of Swedish 9<sup>th</sup> graders, rates of bullying experienced by migrant children were associated  
39 with migrant density in schools, whereby migrant children attending schools with low  
40 migrant density reported 3 times the rate of bullying compared with those attending  
41 schools with high migrant density.(38)  
42  
43  
44  
45

46  
47 The remarkable resilience observed in displaced children has been a topic of significant  
48 discourse and study.(3) Healthy and positive adaptive processes are associated with social  
49 inclusion, supportive family environments, good caregiver mental health, and positive  
50 school experiences.(34, 39) Research and experience suggest that the most effective way to  
51 protect and promote refugee child mental health is through comprehensive psychosocial  
52 interventions that address psychological suffering in the context of the child's family and  
53 environment; such interventions necessarily include family, education, and community  
54 needs and caregiver mental health.(40)  
55  
56  
57  
58  
59  
60



### *Unaccompanied minors*

The numbers of unaccompanied and separated children (UASC) seeking asylum in Europe have increased in recent years.(41) During 2015, 96,465, and in 2016, 63,260 unaccompanied children applied for asylum in the 28 EU member states, with Germany receiving about a third of these children.(42)

The mental health of unaccompanied refugee adolescents during the first years of exile has been studied in several European epidemiological studies in recent years.(43-52) In the largest of these studies, a comparison was made between three groups: (1) newly arrived, unaccompanied children aged 12–18 years in the Netherlands, (2) young refugees of the same age who had arrived with their parents and (3) an age-matched Dutch group.(43) The unaccompanied youths had much higher levels of depressive symptoms than the accompanied refugee children (47 vs 27%), and this was partly explained by a higher burden of traumatic stress. Follow-up interviews 12 months later showed no indication of improvement. The level of externalizing symptoms and behaviour problems were, however, lower among the unaccompanied refugees than in the Dutch comparison population. A similar picture of high levels of traumatic stress and introverted symptoms was noted in a Norwegian study of 414 unaccompanied youths, carried out at an average of 3.5 years after their arrival in the country.(51)

### *Age assessment*

Having an assumed chronological age above or below 18 years determines the support provided for young asylum seekers in most European countries, despite the fact that many lack documents with an exact birth date.(41) This has led to the use of many different methods to assess age in Europe. In the UK, social workers independent of the migration authorities undertake age assessment interviews which consider any documents or evidence indicating likely age, along with an assessment of appearance and demeanor.(53) Many other European countries rely on medical examinations, primarily in the form of radiographs of the hand/wrist (23 countries), collar bone (15 countries) and/or teeth (17 countries).(54) The individual variation in age specific maturity in the later teens with these methods, and the unknown variation between high and low income countries, make them unsuitable for assessing whether a young person is below or above 18 years of age.(55, 56)

The use of these imprecise methods raise serious ethical and human rights concerns and is often experienced as unfair and stressful by the young asylum seekers.(57) The European Academy of Paediatrics and several national medical associations have therefore recommended their members not to participate in age assessment procedures of asylum applicants on behalf of the state.(58)

### Health policies and child rights

Identification of the health needs of an individual migrant child, and subsequent timely investigation and management may be suboptimal in the arrival countries for a plethora of reasons associated with legal status, health care system efficiencies, and individual factors. A recent survey identified 12 EU/EEA countries with significant inequities in health care entitlements for migrant children (compared to locally born children) according to their legal status.<sup>(59)</sup> In many countries, undocumented children are only able to access emergency health care services.<sup>(60)</sup> Worryingly, in Sweden, a recent Human Rights Watch report found that children spend months without receiving health screening.<sup>(61)</sup>

In the UK, UASC have their specific health needs identified as part of statutory health assessments, where the state has assumed the role of the corporate parent and undertakes the responsibility for the needs of the child. However, accompanied children (those children who arrive with and remain in the care of, their migrant, refugee or asylum seeking parent/s), depend upon their newly arrived parent(s) to negotiate unfamiliar health care systems. Although there have been very few studies assessing access to health care by migrant families, it has been proposed that unfamiliar health care systems, and financial costs of over the counter medications pose specific challenges to the migrant family.<sup>(62)</sup>

Newly settled migrant children have greater needs than the average European child. Thus, access to health care is a major concern for migrant children. In an analysis of health care policies for migrant children, Hjern et al (63) compared entitlements for asylum seeking and undocumented children in 31 EU member and EES states in 2016 with those of resident children. Only seven countries (*Belgium, France, Italy, Norway, Portugal, Spain and Sweden*) have met the obligations of non-discrimination in the CRC and entitled both these categories of migrants, irrespective of legal status, to receive equal health care to that of its nationals. Twelve European countries have limited entitlements to health care for asylum seeking children, including Germany and Slovakia that stand out as the EU countries with the most restrictive health care policies for refugee children.

In all but four countries in the EU/EEA there are systematic health examinations of newly settled migrants of some kind.<sup>(64)</sup> In most eastern European countries and Germany this health examination is mandatory; while in the rest of western and northern Europe it is voluntary. All countries that have a policy of health examination aim to identify communicable diseases, so as to protect the host population. Almost all countries with a voluntary policy, also aim to identify a child's individual health care needs, but this is rarely the case in those countries that have a mandatory policy.

## Implications

Our review of the available evidence indicates that migrant children have particular health risks and needs that differ from both the local populations well as between migrant groups. The body of evidence remains limited, however, as it is based primarily on observational studies from individual countries, with few multi-country or intervention studies. There is a notable need for research on the effect of interventions and policies intended to promote and protect migrant children's health, well-being and positive development.

There is also a need to go beyond research, to improve access and quality of care for migrant children. The International Society for Social Pediatrics and Child Health recently released a position paper with recommendations for health policy, health care, research and advocacy.<sup>(3)</sup> These recommendations are grounded in child rights, and can serve as a guide for individuals, groups and organisations seeking to improve the health and wellbeing of migrant children.

## Conclusion

Asylum seeking, refugee and undocumented children in Europe have significant health risks and needs that differ from children in the local population. Health policies across EU and EES member states vary widely, and migrant children in Europe face a broad range of barriers in access to care. The Convention on the Rights of the Child provides children with the right to access to health care without discrimination and to the conditions that promote optimal health and wellbeing. With children increasingly on the move, it is imperative that individuals and sectors that meet and work with these children are aware of their health risks and needs and are equipped to respond to them.

## Acknowledgements

The authors would like to thank the ISSOP Migration Working Group, whose work inspired this review paper.

**Table 1. Definitions**

|                              |                                                                                                                                                                                                                                                                                                                           |
|------------------------------|---------------------------------------------------------------------------------------------------------------------------------------------------------------------------------------------------------------------------------------------------------------------------------------------------------------------------|
| <i>Child</i>                 | Person under the age of 18 years.(4)                                                                                                                                                                                                                                                                                      |
| <i>Asylum seeker</i>         | Persons or children of such persons who are in the process of applying for refugee status under the 1951 Geneva Refugee Convention.(65)                                                                                                                                                                                   |
| <i>Refugee</i>               | A person, who “owing to well-founded fear of persecution for reasons of race, religion, nationality, membership of a particular social group or political opinions, is outside the country of his nationality and is unable or, owing to such fear, is unwilling to avail himself of the protection of that country”.(66) |
| <i>Undocumented children</i> | Children who live without a residence permit, have overstayed visas or have refused immigration applications and who have not left the territory of the destination country subsequent to receipt of an expulsion order or children passing through or residing temporarily in a country without seeking asylum. (59)     |
| <i>Unaccompanied minors</i>  | Children who have been separated from both parents and other relatives and are not being cared for by any adult.                                                                                                                                                                                                          |

**Table 2. Barriers in access to care for migrant children**

|                                  |                                                                                                                  |                                                                                                                      |
|----------------------------------|------------------------------------------------------------------------------------------------------------------|----------------------------------------------------------------------------------------------------------------------|
| Information                      | Patients and families                                                                                            | Unfamiliar health system, lack of knowledge about where and how to seek care                                         |
|                                  |                                                                                                                  | Variable education and literacy, with variable knowledge about health                                                |
|                                  |                                                                                                                  | Lack of awareness about health rights                                                                                |
|                                  | Health professionals                                                                                             | Variable understanding of and experience with treating migrant children                                              |
|                                  |                                                                                                                  | Limited epidemiological data on the health status and context-specific risks of migrant children                     |
|                                  |                                                                                                                  | Lack of clear and readily available national guidance on the legal and practical aspects of health care for migrants |
| Culture and language differences | Language barriers, with limited or lack of access to medical interpreters                                        |                                                                                                                      |
|                                  | Differing cultural and health beliefs                                                                            |                                                                                                                      |
|                                  | Expectations for health care encounter may differ between the health professional and patient/family             |                                                                                                                      |
| Financial                        | Costs associated with care may include transport to health facility, treatment, medications and medical supplies |                                                                                                                      |
| Other barriers                   | Distance to health facility, transportation needed to access care                                                |                                                                                                                      |
|                                  | Multiple housing relocations                                                                                     |                                                                                                                      |
|                                  | Insufficient time allotted to appointments                                                                       |                                                                                                                      |
|                                  | Fear, including the fear that accessing care may affect asylum decision                                          |                                                                                                                      |
|                                  | Breakdown in trust between patients and health workers                                                           |                                                                                                                      |

**Figure 1. Flow diagram**

## References

1. UNHCR. Global Trends: Forced displacement in 2017. Geneva: 2018 Accessed 11 July 2018.
2. EUROSTAT. Asylum statistics explained: 2017. 2018.
3. ISSOP Migration Working Group. ISSOP position statement on migrant child health. Child: care, health and development. 2017 Jul 23.
4. Convention on the Rights of the Child, 1989.
5. Markkula N, Cabieses B, Lehti V, Uphoff E, Astorga S, Stutzin F. Use of health services among international migrant children – a systematic review. *Globalization and Health*. 2018 16 May 2018;14:52.
6. Devi S. Unaccompanied migrant children at risk across Europe. *Lancet (London, England)*. 2016 25 Jun;387(10038):2590.
7. Marquardt L, Kramer A, Fischer F, Pruffer-Kramer L. Health status and disease burden of unaccompanied asylum-seeking adolescents in Bielefeld, Germany: cross-sectional pilot study. *Tropical Medicine and International Health*. 2016 01 Feb;21(2):210-8.
8. Noori T. Assessing the burden of key infectious diseases affecting migrant populations in the EU/EEA. Stockholm: European Centre for Disease Prevention and Control,, 2014 Accessed 8 June 2018.
9. Van Berlaer G, Carbonell FB, Manantsoa S, De Bethune X, Buyl R, Debacker M, et al. A refugee camp in the centre of Europe: Clinical characteristics of asylum seekers arriving in Brussels. *BMJ Open*. 2016 01 Nov;6 (11)(e013963).
10. Eiset AH, Wejse C. Review of infectious diseases in refugees and asylum seekers—current status and going forward. *Public Health Reviews*. 2017 08 September 2017;38:22.
11. Mipatrini D, Stefanelli P, Severoni S, Rezza G. Vaccinations in migrants and refugees: a challenge for European health systems. A systematic review of current scientific evidence. *Pathogens and Global Health*. 2017 02/06;111(2):59-68.
12. Williams GA, Bacci S, Shadwick R, Tillmann T, Rechel B, Noori T, et al. Measles among migrants in the European Union and the European Economic Area. *Scandinavian journal of public health*. 2016 01 Feb;44(1):6-13.
13. Michaelis K, Wenzel JJ, Stark K, Faber M. Hepatitis A virus infections and outbreaks in asylum seekers arriving to Germany, September 2015 to March 2016. *Emerging Microbes and Infections*. 2017 April;6 (4)(e26).
14. Mellou K, Christostomou A, Sideroglou T, Georgakopoulou T, Kyritsi M, Hadjichristodoulou C, et al. Hepatitis a among refugees, asylum seekers and migrants living in hosting facilities, Greece, April to December 2016. *Eurosurveillance*. 2017;22(4).
15. World Health Organization. Migration and communicable diseases: no systematic association Copenhagen2017 [Accessed 8 June 2018]. Available from: <http://www.euro.who.int/en/health-topics/health-determinants/migration-and-health/migrant-health-in-the-european-region/migration-and-health-key-issues#292117>.
16. Belhassen-Garcia M, Perez del Villar L, Pardo-Lledias J, Gutierrez Zufiaurre MN, Velasco-Tirado V, Cordero-Sanchez M, et al. Imported transmissible diseases in minors coming to Spain from low-income areas. *Clinical Microbiology and Infection*. 2015 01 Apr;21(4):370.e5-.e8.
17. Bennet R, Eriksson M. Tuberculosis infection and disease in the 2015 cohort of unaccompanied minors seeking asylum in Northern Stockholm, Sweden. *Infectious diseases (London, England)*. 2017 Jul;49(7):501-6.
18. Hatleberg CI, Prah J, Rasmussen JN, Andersen PH, Bjerrum S, Thomsen VO, et al. A review of paediatric tuberculosis in Denmark: 10 year trend, 2000-2009. *Tropical Medicine and International Health*. 2013 September;18:167-8.
19. Odone A, Tillmann T, Sandgren A, Williams G, Rechel B, Ingleby D, et al. Tuberculosis among migrant populations in the European Union and the European Economic Area. *The European Journal of Public Health*. 2015 12/14;25(3):506-12.

20. Hernando V, Alvarez-del Arco D, Alejos B, Monge S, Amato-Gauci AJ, Noori T, et al. HIV Infection in Migrant Populations in the European Union and European Economic Area in 2007-2012: An Epidemic on the Move. *Journal of acquired immune deficiency syndromes (1999)*. 2015 Oct 1;70(2):204-11.
21. Ciervo A, Mancini F, Di Bernardo F, Giammanco A, Vitale G, Dones P, et al. Louseborne relapsing fever in young migrants, sicily, Italy, july-september 2015. *Emerging Infectious Diseases*. 2016 January;22(1):152-3.
22. Artelt T, Bley I, Lange M, Kuhnle I, Eiffert H, Gross U, et al. Prevalence of multidrug-resistant bacteria in refugees: A retrospective 12-month surveillance study in a university pediatric hospital in Germany. *International Journal of Medical Microbiology*. 2016 December;306 (8 Supplement 1):25-6.
23. UNICEF. Refugee and Migrant Crisis in Europe Humanitarian Situation Report No. 28. Accessed 16 August 2018.
24. Keygnaert I, Ivanova O, Guieu A, Van Parys AS, Leye E, Roelens K. What is the Evidence on the Reduction of Inequalities in Accessibility and Quality of Maternal Health Care Delivery for Migrants? A Review of the Existing Evidence in the WHO European Region. Copenhagen: World Health Organization; 2016.
25. IOM, UNICEF. Data Brief: Migration of Children to Europe. 2015. Accessed 5 December 2016.
26. Bollini P, Pampallona S, Wanner P, Kupelnick B. Pregnancy outcome of migrant women and integration policy: A systematic review of the international literature. *Social Science & Medicine*. 2009 2009/02/01;68(3):452-61.
27. Villadsen SF, Sievers E, Andersen AM, Arntzen A, Audard-Mariller M, Martens G, et al. Cross-country variation in stillbirth and neonatal mortality in offspring of Turkish migrants in northern Europe. *European journal of public health*. 2010 Oct;20(5):530-5.
28. Kulla M, Josse F, Stierholz M, Hossfeld B, Lampl L, Helm M. Initial assessment and treatment of refugees in the Mediterranean Sea (a secondary data analysis concerning the initial assessment and treatment of 2656 refugees rescued from distress at sea in support of the EUNAVFOR MED relief mission of the EU). *Scandinavian journal of trauma, resuscitation and emergency medicine*. 2016 20 May;24:75.
29. Baillot H, Murray N, Connelly E, Howard N. Addressing female genital mutilation in Europe: a scoping review of approaches to participation, prevention, protection, and provision of services. *International Journal for Equity in Health*. 2018 February 08;17(1):21.
30. Saunders NR, Macpherson A, Guan J, Guttman A. Unintentional injuries among refugee and immigrant children and youth in Ontario, Canada: a population-based cross-sectional study. *Injury prevention : journal of the International Society for Child and Adolescent Injury Prevention*. 2017 Sep 25.
31. Prinz N, Konrad K, Hahn E, Danne T, Dreher-Preis L, Grulich-Henn J, et al. New challenges in pediatric diabetes care: Frequency and medical treatment of type 1 diabetes among current refugees in Germany and Austria. *Pediatric Diabetes*. 2016 October;17:26-7.
32. Pavlopoulou ID, Tanaka M, Dikaloti S, Samoli E, Nisianakis P, Boleti OD, et al. Clinical and laboratory evaluation of new immigrant and refugee children arriving in Greece. *BMC Pediatrics*. 2017 26 May;17 (1)(132).
33. Williams B, Cassar C, Siggers G, Taylor S. Medical and social issues of child refugees in Europe. *Archives of disease in childhood*. 2016 Sep;101(9):839-42.
34. Fazel M, Reed RV, Panter-Brick C, Stein A. Mental health of displaced and refugee children resettled in high-income countries: risk and protective factors. *Lancet*. 2012;379(9812):266-82.
35. Slone M, Mann S. Effects of War, Terrorism and Armed Conflict on Young Children: A Systematic Review. *Child psychiatry and human development*. 2016.
36. Montgomery E. Trauma and resilience in young refugees: a 9-year follow-up study. *Development and psychopathology*. 2010 May;22(2):477-89.



- 1
- 2
- 3
- 4 37. Montgomery E, Foldspang A. Discrimination, mental problems and social adaptation in
- 5 young refugees. *European journal of public health*. 2008;18(2):156-61.
- 6 38. Hjern A, Rajmil L, Bergstrom M, Berlin M, Gustafsson PA, Modin B. Migrant density and well-
- 7 being--a national school survey of 15-year-olds in Sweden. *European journal of public health*. 2013
- 8 Oct;23(5):823-8.
- 9 39. Betancourt TS, Khan KT. The mental health of children affected by armed conflict: protective
- 10 processes and pathways to resilience. *International Review of Psychiatry*. 2008;20(3):317-28.
- 11 40. Fazel M, Betancourt TS. Preventive mental health interventions for refugee children and
- 12 adolescents in high-income settings. *The Lancet Child & Adolescent Health*. 2018;2(2):121-32.
- 13 41. UNICEF. Children on the move Geneva: UNICEF; 2016 [Accessed January 3].
- 14 <https://www.unicef-irc.org/research-watch/Children-on-the-move/>.
- 15 42. EUROSTAT. Asylum applicants considered to be unaccompanied minors 2017 [Accessed 10
- 16 July 2018]. Available from:
- 17 [http://appsso.eurostat.ec.europa.eu/nui/show.do?dataset=migr\\_asyunaa&lang=en](http://appsso.eurostat.ec.europa.eu/nui/show.do?dataset=migr_asyunaa&lang=en) . .
- 18 43. Bean TM, Eurelings-Bontekoe E, Spinhoven P. Course and predictors of mental health of
- 19 unaccompanied refugee minors in the Netherlands: One year follow-up. *Social Science and*
- 20 *Medicine*. 2007 March;64(6):1204-15.
- 21 44. Bronstein I, Montgomery P, Dobrowolski S. PTSD in asylum-seeking male adolescents from
- 22 Afghanistan. *Journal of traumatic stress*. 2012 Oct;25(5):551-7.
- 23 45. Bronstein I, Montgomery P, Ott E. Emotional and behavioural problems amongst Afghan
- 24 unaccompanied asylum-seeking children: results from a large-scale cross-sectional study. *European*
- 25 *child & adolescent psychiatry*. 2013 May;22(5):285-94.
- 26 46. Derluyn I, Broekaert E. Different perspectives on emotional and behavioural problems in
- 27 unaccompanied refugee children and adolescents. *Ethnicity and Health*. 2007 April;12(2):141-62.
- 28 47. Derluyn I, Broekaert E. Unaccompanied refugee children and adolescents: the glaring
- 29 contrast between a legal and a psychological perspective. *International journal of law and*
- 30 *psychiatry*. 2008 Aug-Sep;31(4):319-30.
- 31 48. Derluyn I, Broekaert E, Schuyten G. Emotional and behavioural problems in migrant
- 32 adolescents in Belgium. *European Child and Adolescent Psychiatry*. 2008 February;17(1):54-62.
- 33 49. Hodes M, Jagdev D, Chandra N, Cunniff A. Risk and resilience for psychological distress
- 34 amongst unaccompanied asylum seeking adolescents. *Journal of Child Psychology and Psychiatry*
- 35 *and Allied Disciplines*. 2008 July;49(7):723-32.
- 36 50. Huemer J, Karnik N, Voelkl-Kernstock S, Granditsch E, Plattner B, Friedrich M, et al.
- 37 Psychopathology in African unaccompanied refugee minors in Austria. *Child psychiatry and human*
- 38 *development*. 2011 Jun;42(3):307-19.
- 39 51. Seglem KB, Oppedal B, Raeder S. Predictors of depressive symptoms among resettled
- 40 unaccompanied refugee minors. *Scandinavian journal of psychology*. 2011 Oct;52(5):457-64.
- 41 52. Vervliet M, Lammertyn J, Broekaert E, Derluyn I. Longitudinal follow-up of the mental health
- 42 of unaccompanied refugee minors. *European Child and Adolescent Psychiatry*. 2014 May;23(5):337-
- 43 46.
- 44 53. Busler D, Cowell K, Johnson H, Kane J. Age Assessment Guidance: Guidance to assist social
- 45 workers and their managers in undertaking age assessments in England. Association of Directors of
- 46 Children's Services; 2015. Accessed.
- 47 54. European Asylum Support Office. Age assessment practice in Europe. European Asylum
- 48 Support Office,, 2014 Accessed 2017-01-03.
- 49 55. Cole TJ. The evidential value of developmental age imaging for assessing age of majority.
- 50 *Ann Hum Biol*. 2015;42(4):379-88.
- 51 56. Aynsley-Green A, Cole TJ, Crawley H, Lessof N, Boag LR, Wallace RM. Medical, statistical,
- 52 ethical and human rights considerations in the assessment of age in children and young people
- 53 subject to immigration control. *British medical bulletin*. 2012 Jun;102:17-42.
- 54
- 55
- 56
- 57
- 58
- 59
- 60

- 1  
2  
3 57. Hjern A, Ascher H, Vervliet M. Age assessment of young asylum seekers – science or  
4 deterrence? In: Semovilla D, etc, editors. Handbook of research with unaccompanied children  
5 press.  
6  
7 58. Sauer PJ, Nicholson A, Neubauer D, Advocacy, Ethics Group of the European Academy of P.  
8 Age determination in asylum seekers: physicians should not be implicated. *Eur J Pediatr*. 2016  
9 Mar;175(3):299-303.  
10  
11 59. Stubbe Ostergaard L, Norredam M, Mock-Munoz de Luna C, Blair M, Goldfeld S, Hjern A.  
12 Restricted health care entitlements for child migrants in Europe and Australia. *European journal of  
13 public health*. 2017 Jun 14.  
14  
15 60. Voy ML, Keith L. Undocumented children's health-key challenges and local responses. *Italian  
16 Journal of Pediatrics Conference: 70th Congress of the Italian Society of Pediatrics Palermo Italy  
17 Conference Publication*:. 2014;40.  
18  
19 61. Riddell R. Seeking Refuge: Unaccompanied Childre in Sweden. Human Rights Watch, 2016  
20 Accessed 19 July 2018.  
21  
22 62. Alkahtani S, Cherrill J, Millward C, Grayson K, Hilliam R, Sammons H, et al. Access to  
23 medicines by child refugees in the east midlands region of england: A cross-sectional study. *BMJ  
24 Open*. 2014;4 (12).  
25  
26 63. Hjern A, Ostergaard LS, Norredam M, de Luna CMM, Goldfeld S. Health policies for migrant  
27 children in Europe and Australia. *The Lancet*. 2017 21 Jan;389(10066):249.  
28  
29 64. Hjern A, Stubbe-Oatergaard L. Migrant children in Europe: Entitlements to health care.  
30 London: EU Commission, 2016 Accessed  
31  
32 65. UNICEF. Uprooted: The growing crisis for refugee and migrant children. UNICEF, 2016  
33 Accessed 20 October 2016.  
34  
35 66. IOM. International Migration Law: Glossary on Migration. 2004. Accessed 16 March 2017.  
36  
37  
38  
39  
40  
41  
42  
43  
44  
45  
46  
47  
48  
49  
50  
51  
52  
53  
54  
55  
56  
57  
58  
59  
60



1  
2  
3  
4  
5  
6  
7  
8  
9  
10  
11  
12  
13  
14  
15  
16  
17  
18  
19  
20  
21  
22  
23  
24  
25  
26  
27  
28  
29  
30  
31  
32  
33  
34  
35  
36  
37  
38  
39  
40  
41  
42  
43  
44  
45  
46  
47  
48  
49  
50  
51  
52  
53  
54  
55  
56  
57  
58  
59  
60

Identification  
Screening  
Eligibility  
Included

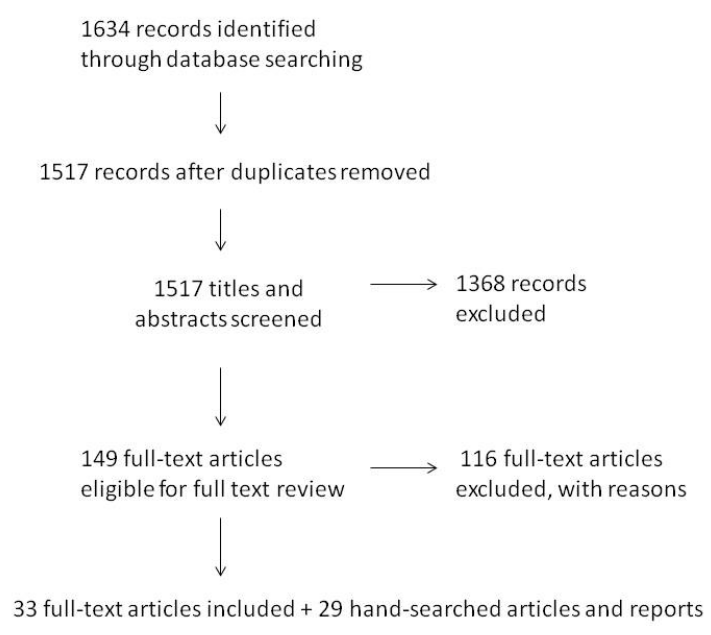

254x190mm (96 x 96 DPI)

# BMJ Paediatrics Open

## **Children on the move in Europe: A narrative review of the evidence on the health risks, health needs, and health policy for asylum seeking, refugee and undocumented children**

|                               |                                                                                                                                                                                                                                                                                                                                                                              |
|-------------------------------|------------------------------------------------------------------------------------------------------------------------------------------------------------------------------------------------------------------------------------------------------------------------------------------------------------------------------------------------------------------------------|
| Journal:                      | <i>BMJ Paediatrics Open</i>                                                                                                                                                                                                                                                                                                                                                  |
| Manuscript ID                 | bmjpo-2018-000364.R1                                                                                                                                                                                                                                                                                                                                                         |
| Article Type:                 | Original article                                                                                                                                                                                                                                                                                                                                                             |
| Date Submitted by the Author: | 01-Dec-2018                                                                                                                                                                                                                                                                                                                                                                  |
| Complete List of Authors:     | Kadir, Ayesha; Malmo Hogskola, Malmö Institute for Studies of Migration, Diversity and Welfare<br>Battersby, Anna; Kaleidoscope Centre for Children and Young People, Lewisham and Greenwich NHS Trust, London<br>Spencer, Nick; University of Warwick Warwick Medical School, Division of Mental Health and Wellbeing<br>Hjern, Anders; Centre for Health Equity Studies, ; |
| Keywords:                     | Children's Rights, General Paediatrics                                                                                                                                                                                                                                                                                                                                       |
|                               |                                                                                                                                                                                                                                                                                                                                                                              |

SCHOLARONE™  
Manuscripts

1  
2  
3 **Children on the move in Europe: A narrative review of the evidence on the health risks,**  
4 **health needs, and health policy for asylum seeking, refugee and undocumented children**  
5  
6  
7  
8

9 Ayesha Kadir\*, Anna Battersby, Nick Spencer, Anders Hjern  
10

11  
12  
13 Ayesha Kadir

14 Institute for Studies of Migration, Diversity and Welfare  
15 Malmö University  
16 Niagara  
17 205 06 Malmö  
18 Sweden  
19 [kadira@gmail.com](mailto:kadira@gmail.com)  
20  
21 Tel: +45 53 45 85 62  
22

23  
24 Anna Battersby

25 Kaleidoscope Centre for Children and Young People  
26 Lewisham and Greenwich NHS Trust  
27 London  
28 UK  
29

30  
31  
32 Nick Spencer

33 Emeritus Professor of Child Health  
34 Division of Mental Health and Wellbeing  
35 Warwick Medical School, University of Warwick,  
36 Coventry CV4 9JD  
37 UK  
38  
39

40 Anders Hjern

41 Clinical Epidemiology,  
42 Department of Medicine,  
43 Karolinska Institutet and Centre for Health Equity Studies (CHESS), Karolinska  
44 Institutet/Stockholm University.  
45 Stockholm,  
46 Sweden  
47  
48  
49  
50

51 **Key words:** Child health, migration, child rights, social determinants of health  
52  
53  
54  
55  
56  
57  
58  
59  
60

1  
2  
3 **Abstract**  
4  
5

6 **Background:** Europe has experienced a marked increase in the number of children on the  
7 move. The evidence on the health risks and needs of migrant children is  
8 primarily from North America and Australia.  
9

10 **Objective:** To summarise the literature and identify the major knowledge gaps on the  
11 health risks and needs of asylum seeking, refugee, and undocumented  
12 children in Europe in the early period after arrival, and the ways in which  
13 European health policies respond to these risks and needs.  
14  
15

16 **Design:** Literature searches were undertaken in PubMed and EMBASE for studies on  
17 migrant child health in Europe from 1 January 2007 - 8 August 2017. The  
18 database searches were complemented by hand searches for peer-reviewed  
19 papers and grey literature reports.  
20

21 **Results:** The health needs of children on the move in Europe are highly  
22 heterogeneous and depend on the conditions before travel, during the  
23 journey, and after arrival in the country of destination. Although the bulk of  
24 the recent evidence from Europe is on communicable diseases, the major  
25 health risks for this group are in the domain of mental health, where  
26 evidence regarding effective interventions is scarce. Health policies across EU  
27 and EES member states vary widely, and children on the move in Europe  
28 continue to face structural, financial, language and cultural barriers in access  
29 to health care affect child health care and outcomes.  
30  
31  
32  
33

34 **Conclusions:** Asylum seeking, refugee and undocumented children in Europe have  
35 significant health risks and needs that differ from children in the local  
36 population. Major knowledge gaps were identified regarding interventions  
37 and policies to treat and to promote the health and well-being of children on  
38 the move.  
39  
40

41  
42  
43 **Funding:** This research received no specific grant from any funding agency in the  
44 public, commercial or not-for-profit sectors.  
45  
46  
47  
48  
49  
50  
51  
52  
53  
54  
55  
56  
57  
58  
59  
60

## Introduction

Forced displacement is a major child health issue worldwide. More than 13 million children live as refugees or asylum seekers outside their country of birth.(1) Conservative estimates suggest that nearly 180,000 children on the move are unaccompanied or separated from their caregivers.(1) The majority of these children live in Asia, the Middle East, and Africa.(2)

Europe has experienced a marked increase in the number of irregular migrants since 2011, with a peak in arrivals during 2015.(3) Children have accounted for a large proportion of people making the journey, either with family or on their own, in search of safety, stability and a better future. Between 2015 and 2017, more than 1 million asylum applications were made for children in Europe.(3) The majority of these children originated from Syria, Iraq and Afghanistan.(2) In 2017, 70% of the 210,000 asylum claims made for children in Europe were filed in Germany, France, Greece and Italy.(4)

The phenomenon of migration to Europe has been characterised by continual evolution; with frequent changes in the most common migration routes, modes of travel, and the length of stay in transit countries. Children making these dangerous and often prolonged journeys are exposed to considerable health risks. The health of children on the move is related to their health status before the journey, conditions in transit and after arrival, and is influenced by experience of trauma, the health of their caregivers, and their ability to access health care.(5)

Much of the literature on the health of children on the move comes from North America and Australia. In light of the marked increase in the number of children arriving in Europe and the need for improved understanding of the situation for these children in the European context, this paper reviews the health risks and needs of children on the move in Europe and how European health policies respond to these risks and needs. It is important to note that children may live for months or years in one or several countries before settling, being repatriated, or going underground. In the longer term, factors such as the social determinants of health, ethnicity, and issues relating to legal status and prolonged periods of transit begin to take precedence.

**What is known**

- ☐ Europe has experienced a significant increase in migration of displaced people escaping humanitarian crises
- ☐ Displaced children are known to be vulnerable to violence, violation of their rights and discrimination
- ☐ The existing literature on the health of children on the move in Europe is largely focused on infectious disorders
- ☐ The Convention on the Rights of the Child provides children on the move with the right to the conditions that promote optimal health and wellbeing and with access to health care without discrimination

**What this study adds**

- ☐ Comprehensive summary of the literature covering all aspects of the health of children on the move in Europe
- ☐ Indicates that the main challenges for child health services lie in the domain of mental health and well-being
- ☐ Indicates that many children on the move in Europe are insufficiently vaccinated
- ☐ Identifies significant gaps in knowledge, in particular with regards to policies and interventions to promote child health and well-being
- ☐ Identifies research priorities to promote effective, ethical care and support health policy

The Convention on the Rights of the Child (CRC) affords all children with the right to health care without discrimination.<sup>(6)</sup> Articles 2, 9, 20, 22, 30 and 39 devote specific attention to the rights of displaced and unaccompanied children.<sup>(6)</sup> As such, the CRC provides a useful framework to address the health of children on the move.

Terms such as migrants, refugees and asylum seekers are often used interchangeably and may shift the focus away from people toward political discourse. In this paper, we focus on asylum seeking, refugee and undocumented children (Table 1). Undocumented children are included because they are known to be a mobile and highly marginalised group, with particular barriers in access to services. We use the term “children on the move” for these three groups of children in order to maintain a rights-based focus.

**Table 1. Definitions**

|                              |                                                                                                                                                                                                                                                                                                                          |
|------------------------------|--------------------------------------------------------------------------------------------------------------------------------------------------------------------------------------------------------------------------------------------------------------------------------------------------------------------------|
| <i>Child</i>                 | Person under the age of 18 years.(6)                                                                                                                                                                                                                                                                                     |
| <i>Asylum seeker</i>         | Persons or children of such persons who are in the process of applying for refugee status under the 1951 Geneva Refugee Convention.(7)                                                                                                                                                                                   |
| <i>Refugee</i>               | A person, who "owing to well-founded fear of persecution for reasons of race, religion, nationality, membership of a particular social group or political opinions, is outside the country of his nationality and is unable or, owing to such fear, is unwilling to avail himself of the protection of that country".(8) |
| <i>Undocumented children</i> | Children who live without a residence permit, have overstayed visas or have refused immigration applications and who have not left the territory of the destination country subsequent to receipt of an expulsion order or children passing through or residing temporarily in a country without seeking asylum.(7)      |
| <i>Unaccompanied minors</i>  | Children who have been separated from both parents and other relatives and are not being cared for by any adult.                                                                                                                                                                                                         |

## Methods

The findings presented in this review are based on a comprehensive literature search of studies on the health of children on the move in Europe from 1 January 2007- 8 August 2017. Searches were run in PubMed and EMBASE on 8 August 2017. Search terms included combinations of terms for children such as "child", "youth", and "adolescent" with terms for migrant, such as "migrant", "asylum seeker", "refugee" and "undocumented migrant", and with terms for countries in the European Union as well as five countries that are major origin and transit countries for children travelling to Europe, including Afghanistan, Jordan, Lebanon, Syria, and Turkey. The database searches were limited to papers providing data on children (birth-18 years) in the English language. Papers were included if they addressed physical and mental health of children on the move, health examinations of these children, the effect of caregiver mental health, access to care, or disparities in care between children on the move and the local population. Multi-regional reviews that provided data on children in Europe were also included. Papers on adult populations (defined as a study population  $\geq 18$  years) that did not provide disaggregated data on children were excluded. However, papers including UASC with a stated age  $\leq 19$  years were included, as well as longitudinal cohort studies that followed migrant children into early adulthood ( $< 24$  years old). Additional exclusion criteria included special populations, small single-facility studies, lack of migrant and/or health focus, intervention studies that did not provide data on child health outcomes, and papers from non-European host countries. Commentaries and conference abstracts were excluded. For further information on specific child health and policy topics, hand searches were also undertaken to identify relevant peer-reviewed papers and grey literature reports.

## Patient and Public Involvement

No patients were involved in this study.

## Results

The searches identified 1634 records. After removing 117 duplicates, 1517 titles were screened. 149 papers were reviewed in full text review, of which 118 papers were excluded. Our final sample included 31 papers. An additional 23 articles and reports were identified by the hand searches (Figure 1: Flow diagram). Table 2 provides an overview of the 45 original research studies and review papers that are included in this review.

### Figure 1: Flow diagram



**Table 2. Table of included studies (does not include grey literature reports unless they provided data from original research)**

| Original research articles     |                 |                                                                     |                                                                                   |                             |                                                                                                                                                                                                                                                                                                                                                                                                                                                                                                     |
|--------------------------------|-----------------|---------------------------------------------------------------------|-----------------------------------------------------------------------------------|-----------------------------|-----------------------------------------------------------------------------------------------------------------------------------------------------------------------------------------------------------------------------------------------------------------------------------------------------------------------------------------------------------------------------------------------------------------------------------------------------------------------------------------------------|
| First author and year          | Country         | Study population                                                    | Study design                                                                      | Sample size (children only) | Summary of findings                                                                                                                                                                                                                                                                                                                                                                                                                                                                                 |
| Alkahtani, S(9) (2014)         | England         | Refugee children in the East Midlands compared with native controls | Case-control                                                                      | 117 migrant / 99 native     | Comparison made between the children of 50 refugee parents (N=117 children) with children of 50 English parents (N=99 children), with median ages 5 and 4 years, respectively. Refugee children were more likely to receive prescribed medicines during the previous month (p=0.008) and 6 months (p<0.001) than English children, and were less likely to receive over the counter (OTC) medicines in the past 6 months (p=0.009). The findings suggest financial barrier in access to medication. |
| Baillet, H(10) (2018)          | Multiple        | Asylum seekers                                                      | Literature review, in-depth interviews with experts in EU-based FGM interventions | N/A                         | FGM is an important basis for asylum claims girls and women in Europe. Monitoring and interventions vary between countries. There are no pooled data, however, as variations in reporting practices between countries preclude the evaluation or monitoring of FGM-based asylum claims in the EU.                                                                                                                                                                                                   |
| Bean, TM(11) (2007)            | The Netherlands | UASC <18 years old                                                  | Prospective cohort study                                                          | 582                         | The self-reported psychological distress of refugee minors was found to be severe (50%) and of a chronic nature (stable for one year) and was confirmed by reports from the guardians (33%) and teachers (36%). The number of self-reported adverse life events was strongly related to the severity of psychological distress.                                                                                                                                                                     |
| Belhassen-Garcia, M(12) (2015) | Spain           | Immigrant children and young people(a) <18 years old                | Observational cohort                                                              | 373                         | Immigrants <18 years of age coming from Sub-Saharan Africa, North Africa and Latin America were prospectively screened between January 2007 and December 2011. Latent tuberculosis was found in 12.7% (36/285), Active TB infection in 1% (3/285), HBV in 4.3% (15/350), and HCV in 2.35% (8/346). None (0/358) were HIV positive.                                                                                                                                                                  |
| Bennet, R(13) (2017)           | Sweden          | UASC <18 years old                                                  | Observational cohort                                                              | 2422                        | 2422 UASC were screened for tuberculosis with a Mantoux tuberculin skin test or a QuantiFERON-TB Gold. 349 had a positive test, of which 16 had TB disease and 278 latent tuberculosis infections (LTBI). Children originating from the horn of Africa had high prevalence of latent TB and TB disease.                                                                                                                                                                                             |
| Bronstein, I(14) (2012)        | United Kingdom  | Afghan UASC 13-18 years                                             | Cross-sectional survey                                                            | 222                         | One third of youth were found to score above the cut-off on a validated PTSD-screening instrument.                                                                                                                                                                                                                                                                                                                                                                                                  |
| Bronstein, I(15) (2013)        | United Kingdom  | Afghan UASC 13-18 years                                             | Cross-sectional survey                                                            | 222                         | In a survey using the Hopkins Symptoms Checklist 37A, 31.4% scored above cut-offs for emotional and behavioural problems, 34.6% for anxiety and 23.4% for depression. Scores increased with time after arrival in the UK and load of premigration traumatic events.                                                                                                                                                                                                                                 |
| Ciervo, A(16) (2016)           | Italy           | Asylum seeking adolescents <18 years                                | Case series                                                                       | 3                           | Description of Louse-borne relapsing fever in three Somali adolescents who were seeking asylum.                                                                                                                                                                                                                                                                                                                                                                                                     |
| Derluyn, I(17) (2007)          | Belgium         | UASC(b)                                                             | Cross-sectional survey                                                            | 142                         | Between 37 and 47% of the unaccompanied refugee youths had severe or very severe symptoms of anxiety, depression and post-traumatic stress when screened with the Hopkins Symptoms Checklist 37A. Girls and those having experienced many traumatic events are at even higher risk for the development of these emotional problems.                                                                                                                                                                 |
| Derluyn, I(18) (2008)          | Belgium         | Migrant and native adolescents 10-21 years                          | Cross-sectional survey                                                            | 1,249 migrant / 602 native  | Migrant adolescents experienced more traumatic events than their Belgian peers and showed higher levels of peer problems and avoidance symptoms. Non-migrant adolescents demonstrated more symptoms of anxiety, externalizing problems and hyperactivity. Factors influencing the prevalence of emotional and behavioural problems were the number of traumatic events experienced, gender and the living situation.                                                                                |
| Hatleberg, CI(19) (2014)       | Denmark         | Children <15 years old in Denmark                                   | Epidemiological surveillance study                                                | 323                         | 323 TB cases were reported in children aged <15 years in Denmark between 2000 and 2009. The incidence of childhood TB declined from 4.1 per 100 000 to 1.9 per 100 000 during the study period. Immigrant children comprised 79.6% of all cases. Among Danish children, the majority were <5 years and had a known TB exposure. Pulmonary TB was the most common presentation.                                                                                                                      |
| Heudorf, U(20) (2016)          | Germany         | UASC <18 years old                                                  | Observational cohort                                                              | 119                         | UASC arriving in Frankfurt during October-November 2015 had high levels of drug resistant microbial flora. Enterobacteriaceae with extended spectrum beta-lactamases (ESBL) were detected in 42 of 119 (35%) youth. 9 youth had flora with additional resistance to fluoroquinolones (8% of total screened).                                                                                                                                                                                        |

1  
2  
3  
4  
5  
6  
7  
8  
9  
10  
11  
12  
13  
14  
15  
16  
17  
18  
19  
20  
21  
22  
23  
24  
25  
26  
27  
28  
29  
30  
31  
32  
33  
34  
35  
36  
37  
38  
39  
40  
41  
42  
43  
44  
45  
46  
47  
48  
49  
50  
51  
52  
53  
54  
55  
56  
57  
58  
59  
60

|                            |                |                                                                                 |                                                                                                |                            |                                                                                                                                                                                                                                                                                                                                                                                                                                                                                                                                                                                                 |
|----------------------------|----------------|---------------------------------------------------------------------------------|------------------------------------------------------------------------------------------------|----------------------------|-------------------------------------------------------------------------------------------------------------------------------------------------------------------------------------------------------------------------------------------------------------------------------------------------------------------------------------------------------------------------------------------------------------------------------------------------------------------------------------------------------------------------------------------------------------------------------------------------|
| Hjern, A(21) (2013)        | Sweden         | Migrant and native 15 year olds                                                 | Cross-sectional survey                                                                         | 76,229                     | In a national survey using the KIDSCREEN instrument, the psychological well-being in foreign-born children from Africa and Asia was found to be much lower (-0.8 in Z-scores) compared with the majority population if the student body consisted mainly of native students from the majority population. Scores were very similar to the majority population in schools where at least 50% had two foreign-born parents. Bullying explained much of this difference.                                                                                                                           |
| Hjern, A(22) (2017)        | EU27           | Migrant children <18 years                                                      | Cross-sectional survey to clinicians, national child ombudsmen and NGOs                        | N/A                        | Seven EU countries (Belgium, France, Italy, Norway, Portugal and Spain and Sweden) explicitly entitle all non-EU migrant children, irrespective of legal status, to receive equal health care to that of its nationals. Twelve European countries have limited entitlements to health care for asylum seeking children, including Germany that stands out as the country with the most restrictive health care policy for migrant children. The needs of irregular migrants from other EU countries are often overlooked in European health care policy.                                        |
| Hodes, M(23) (2008)        | United Kingdom | UASC (13-18 years old) and accompanied refugee children (13-19 years old)       | Cross-sectional survey                                                                         | 78 UASC and 35 accompanied | UASC had experienced high levels of traumatic events (mean of 6.8 events, range 0-16), and reported high levels of posttraumatic stress symptoms compared with accompanied children. Predictors of high posttraumatic symptoms included low-support living arrangements, female gender, and experience of trauma. Among UASC, posttraumatic symptoms increased with age. High depressive scores were associated with female gender, and region of origin in UASC.                                                                                                                               |
| Huemer, J(24) (2011)       | Austria        | African UASC 15-18 years old                                                    | Observational cohort                                                                           | 41                         | 56% of African UASC had at least one mental health diagnosis by structured clinical interview. The most common diagnoses were adjustment disorder, PTSD and dysthymia.                                                                                                                                                                                                                                                                                                                                                                                                                          |
| Kulla, M(25) (2016)        | Germany        | Refugee infants and children(b) rescued at sea                                  | Observational cohort                                                                           | 293                        | Among the 2656 refugees rescued by a German Naval Force frigate between May – September 2015, 19 (0.7 %) were infants and 274 (10.3 %) were children. 27% of all patients required treatment by a physician due to injury or illness & were defined as "sick". One infant (5.2%) & 38 children (13.9%) were identified as sick. Predominant diagnoses were dermatological diseases, internal diseases and trauma.                                                                                                                                                                               |
| Marquardt, L(26) (2016)    | Germany        | UASC 12-18 years old                                                            | Cross-sectional survey                                                                         | 102                        | Pilot study that employed purpose sampling for a non-representative subset of UASC in Bielefeld, Germany. 59% of the youth had at least one infection, and 20% suffered parasitic infections. 13.7% were diagnosed with mental illness. 17.6% were found to have iron deficiency anaemia. Overall, the youth had a low prevalence of non-communicable diseases (<2.0%).                                                                                                                                                                                                                         |
| Mellou, K(27) (2017)       | Greece         | Refugees, asylum seekers and migrants(a) living in hosting facilities in Greece | Observational study                                                                            | 152                        | Report on Hepatitis A Virus (HAV) infection among refugees in hosting facilities in Greece April - December 2016. A total of 177 cases were found, of which 152 were in children <15 years old.                                                                                                                                                                                                                                                                                                                                                                                                 |
| Michaelis, K(28) (2017)    | Germany        | Asylum seekers with Hepatitis A                                                 | Epidemiological surveillance study                                                             | 231                        | Asylum seeking children 5-9 years old accounted for 97 of 278 (35%) reported HAV cases among asylum seekers during September 2015 to March 2016. The predominant subgenotype was IB, a strain previously reported in the Middle East, Turkey, Pakistan and East Africa. There was one case of transmission from an asymptomatic child to a nursery nurse working in a mass accommodation centre.                                                                                                                                                                                                |
| Montgomery, E(29) (2008)   | Denmark        | Refugees 11-23 years old                                                        | Longitudinal cohort                                                                            | 131                        | Follow up study in refugee children after 9 years. Participants reported a mean of 1.8 experiences of discrimination. An association was found between discrimination, psychological problems and social adaptation. Perceived discrimination predicted internalizing behaviours. Social adaptation was protective, correlating negatively with discrimination as well as externalizing and internalizing behaviours.                                                                                                                                                                           |
| Montgomery, E(30) (2010)   | Denmark        | Refugees 11-23 years old                                                        | Longitudinal cohort                                                                            | 131                        | Same population as Montgomery (2007). Upon arrival, the children experienced high rates of clinically significant psychological problems which reduced markedly at 9 year follow up. Persistent symptoms were associated with higher number of types of stressful events after arrival, suggesting environmental factors play an important role in resilience and recovery from psychological trauma.                                                                                                                                                                                           |
| Odone, A(31) (2015)        | Multiple       | Migrants to the EU(a)                                                           | Literature review, analysis of European Surveillance System data, and information from experts | N/A                        | Primarily reported outcomes in adults. From 2000 - 2009, 15.3% of reported paediatric TB cases in the EU/EEA were of foreign origin. This figure is lower than the proportion of foreign-born reported TB cases in the overall population (26%). Norway, Sweden and Austria reported a higher number of foreign-origin TB cases than native-origin TB cases among children <15 years. Risk-based analysis is limited because surveillance data in most EU/EEA countries do not distinguish between children born in the host country to foreign-born parents from those born to native parents. |
| Pavlopoulou, ID(32) (2017) | Greece         | Migrant and refugee(c) children 1-14 years old                                  | Single facility prospective cross-sectional study                                              | 300                        | Survey of immigrant and refugee children presenting for health examination within 3 months of their arrival, May 2010, and March 2013. The main health problems found included unknown vaccination status (79.3%), elevated blood lead levels (30.6%), dental problems (21.3%), eosinophilia (22.7%), and anaemia (13.7%). 8 children (2.7%) were diagnosed with latent tuberculosis based on Mantoux and chest x-ray, and 2 cases were confirmed with QuantiFERON-TB Gold testing.                                                                                                             |

|                                |          |                                                                              |                                                                         |         |                                                                                                                                                                                                                                                                                                                                                                                                                                                                                                                                                                    |
|--------------------------------|----------|------------------------------------------------------------------------------|-------------------------------------------------------------------------|---------|--------------------------------------------------------------------------------------------------------------------------------------------------------------------------------------------------------------------------------------------------------------------------------------------------------------------------------------------------------------------------------------------------------------------------------------------------------------------------------------------------------------------------------------------------------------------|
| Riddel, R(33) (2016)           | Sweden   | UASC 9-18 years old                                                          | Qualitative interviews                                                  | 53      | The youth described experience of extreme violence and exploitation, as well as lack of access to physical and mental health care. They describe lengthy asylum procedures, delays in receiving a guardian, lack of access to interpreters and inexperienced and inadequately trained staff among guardians in the accommodation centres. Girls and younger children reported being housed with older boys and experiencing bullying and harassment in their accommodation facilities.                                                                             |
| Seglem, KB(34) (2011)          | Norway   | UASC                                                                         | Cross-sectional survey                                                  | 414     | Surveyed of UASC who were granted a residence permit in Norway from 2000 - 2009. The youth ranged from 11 -27 years at the time of the survey. The study found that UASC are a high-risk group for mental health problems also after resettlement in a new country, with high prevalence of depression and PTSD.                                                                                                                                                                                                                                                   |
| Stubbe Østergaard, L(7) (2017) | Multiple | Asylum seekers and undocumented migrant children <18 years                   | Survey and desk review                                                  | N/A     | Surveyed child health professionals, NGOs and European Ombudspersons for Children in 30 EU/EEA countries and Australia and reviewed official documents. Entitlements for asylum seeking, refugee and irregular migrants in the EU are variable, however only five countries (France, Italy, Norway, Portugal and Spain) explicitly entitle all migrant children, irrespective of legal status, to receive equal health care to that of its nationals. The needs of irregular migrants from other EU countries are often overlooked in European health care policy. |
| Van Berlaer, G(35) (2016)      | Belgium  | Asylum seekers                                                               | Single facility cross-sectional study                                   | 391     | Primarily reported outcomes in adults. Nearly half of asylum seekers, & two-thirds of children <5 years suffered from infections. Among children <5 years, 50% had respiratory diseases (n=76), 20% digestive disorders (n=30), 14% skin disorders (n=21) & 7% suffered from injuries (n=10).                                                                                                                                                                                                                                                                      |
| Vervliet, M(36) (2014)         | Belgium  | UASC 14-17 years old                                                         | Longitudinal cohort                                                     | 103     | UASC reported an average of 7.5 traumatic experiences at the study start. The mean number of reported daily stressors increased over the study period. Participants had high scores for anxiety, depression and internalizing symptoms. There were no significant differences in mental health scores over time. The number of traumatic experiences and the number of daily stressors were associated with significantly higher symptom levels of depression (daily stressors), anxiety and PTSD (traumatic experiences and daily stressors).                     |
| Villadsen, SF(37) (2010)       | Multiple | Stillbirths and neonatal deaths of infants born to mothers of Turkish origin | Retrospective prevalence study                                          | 239,387 | Includes data from 9 EU countries. The stillbirth rates were higher in infants born to Turkish mothers than in the native population in all countries. The neonatal mortality was variable, with elevated risks for infants of Turkish mothers in Denmark, Switzerland, Austria and Germany, and lower rates in Netherlands, the United Kingdom and Norway when compared to the native populations.                                                                                                                                                                |
| Williams, GA(38) (2016)        | Multiple | Migrants(d)                                                                  | Literature review, survey of 30 countries, and information from experts | N/A     | National surveillance systems do not systematically record migration-specific information. Experts attributed measles outbreaks to low vaccination coverage or particular health or religious beliefs, and considered outbreaks related to migration to be infrequent. The literature review and country survey suggested that some measles outbreaks in the EU/EEA were due to sub-optimal vaccination coverage in migrant populations.                                                                                                                           |

## Review articles

| First author and year       | Study population                                   | Study design                                                        | Sample size (children only)          | Summary of findings                                                                                                                                                                                                                                                                                                                                |
|-----------------------------|----------------------------------------------------|---------------------------------------------------------------------|--------------------------------------|----------------------------------------------------------------------------------------------------------------------------------------------------------------------------------------------------------------------------------------------------------------------------------------------------------------------------------------------------|
| Aynsley-Green, A(39) (2012) | Refugee & asylum seeking children and young people | Review without information on search strategy or inclusion criteria | N/A                                  | Evidence that X-ray examination of bones & teeth is imprecise and unethical and should not be used. Further research needed on a holistic multi-disciplinary approach to age assessment.                                                                                                                                                           |
| Bollini, P(40) (2009)       | Immigrant women(a) who delivered an infant Europe  | Systematic review and meta-analysis                                 | 18,322,978 pregnancies in 65 studies | 61 studies were cross-sectional design and 27 were from single facilities. Compared data on 1.6 million in immigrant women with 16.7 million native women. Immigrant women had 43% higher risk of low birth weight, 24% of pre-term delivery, 50% of perinatal mortality, and 61% of congenital malformations compared with native European women. |
| Cole, TJ(41) (2015)         | UASC                                               | Review article of methods for age assessment                        | N/A                                  | Most individuals are mature before age 18 in hand-wrist X-rays. On MRI of the wrist and orthopantomogram of the third molar, the mean age of attainment is over 19 years, however if there is immature appearance, these methods are uninformative about likely age; as such, the MRI and third molars have high specificity but low sensitivity.  |
| Derluyn, I(18) (2008)       | UASC                                               | Review without information on search strategy or inclusion criteria | N/A                                  | UASC are a vulnerable population with considerable need for psychological support and therefore need a strong and stable reception system. The creation of such a system would be greatly facilitated if the legal system considered them children first and refugees/migrants second.                                                             |
| Devi, S(42) (2016)          | UASC                                               | Opinion piece                                                       | N/A                                  | Summarises findings on infectious diseases affecting unaccompanied minors based on two UNICEF and one Human Rights Watch reports.                                                                                                                                                                                                                  |

|                                         |                                                                                 |                                                                     |                                       |                                                                                                                                                                                                                                                                                                                                                                                                                                                                                                                                                                                   |
|-----------------------------------------|---------------------------------------------------------------------------------|---------------------------------------------------------------------|---------------------------------------|-----------------------------------------------------------------------------------------------------------------------------------------------------------------------------------------------------------------------------------------------------------------------------------------------------------------------------------------------------------------------------------------------------------------------------------------------------------------------------------------------------------------------------------------------------------------------------------|
| Eiset AH(43) (2017)                     | Refugees and asylum seekers - all ages                                          | Narrative review                                                    | Not specified                         | 51 studies of infectious conditions in refugees and asylum seekers including children and adults. Findings related to children: limited evidence on infectious diseases among refugee and asylum seeking children; relatively low vaccination rates with one study showing 52.5% of migrant children needing triple vaccine and 13.2% needing MMR and a further study showing low levels of rubella immunity among refugee children. The review reports on rates of TB, HIV, hepatitis B and C, malaria and less common infections; however, rates are not reported by age group. |
| Fazel, M(44) (2012)                     | Refugee children and young people                                               | Systematic review                                                   | 5776 children and youth in 44 studies | Exposure to violence, both direct and indirect (through parents), are important risk factors for adverse mental health outcomes in refugee children and adolescents. Protective factors include being accompanied by an adult caregiver, experiencing stable settlement, and social support in the host country.                                                                                                                                                                                                                                                                  |
| Hjern, A(45) (In Press)                 | UASC                                                                            | Narrative review                                                    | N/A                                   | Many UASC come from 'failed states' like Somalia and Afghanistan where official documents with exact birth dates are rarely issued. No currently available medical method has the accuracy needed to replace such documents. Unclear guidelines and arbitrary practices may lead to alarming shortcomings in the protection of this high-risk group of children and adolescents in Europe. Medical participation, as well as non-participation, in these dubious decisions raises a number of ethical questions.                                                                  |
| ISSOP Migration Working Group(5) (2017) | Migrant children in Europe                                                      | Narrative review and position statement                             | N/A                                   | Based on a comprehensive literature search and a rights-based approach, policy statement identifies magnitude of specific health and social problems affecting migrant children in Europe and recommends action by government and professionals to help every migrant child to achieve their potential to live a happy and healthy life, by preventing disease, providing appropriate medical treatment and supporting social rehabilitation.                                                                                                                                     |
| Markkula, N(46) (2018)                  | First and second generation migrant children compared with non-migrant children | Systematic review                                                   | 10,030,311 children in 93 studies     | 57% of included studies were from Europe and 36% from North America. Use of non-emergency healthcare services was less common among migrant compared with non-migrant children: in 19/27 studies reporting on general access to care, 9/19 reporting on vaccine uptake, 9/16 reporting on mental health service use, 9/14 reporting on oral health service use, 10/14 reporting on primary care and other service use. Migrant children were reported to be more likely to use Emergency and Hospital services in 9/15 studies.                                                   |
| Mipatrini D(47) (2017)                  | Migrants and refugees                                                           | Systematic review                                                   | N/A                                   | The study reports primarily on data in adults or where age classification is not specified. Overall, migrants and refugees were found to have lower immunization rates compared with European-born individuals. Studies in migrant children found lower rates of MMR, Polio and tetanus vaccination. Reasons cited include low vaccination coverage in the country of origin and barriers in access to care in Europe.                                                                                                                                                            |
| Sauer, PJ(48) (2016)                    | UASC                                                                            | Editorial/Position statement                                        | N/A                                   | Position statement by the European Academy of Paediatrics outlining medical, ethical and legal reasons for recommending that physicians should not participate in age determination of unaccompanied and separated children seeking asylum.                                                                                                                                                                                                                                                                                                                                       |
| Slone, M(49) (2016)                     | Children aged 0-6 years exposed to war, terrorism or armed conflict             | Systematic review                                                   | 4365 children in 35 studies           | Young children suffer from substantial distress including elevated Risk for PTSD or PTS symptoms, non-specific behavioural and emotional reactions and disturbance of sleep and play rituals. Parental and children's psychopathology correlated and family environment and parental functioning moderates exposure-outcome association for children. The authors conclude that longitudinal studies are needed to describe the developmental trajectories of exposed children.                                                                                                   |
| Williams, B(50) (2016)                  | Refugee children in Europe                                                      | Review without information on search strategy or inclusion criteria | N/A                                   | Increased rates of depression, anxiety disorders and PTSD among refugee children, as well as high levels of dental decay and low immunisation coverage.                                                                                                                                                                                                                                                                                                                                                                                                                           |

a Migrant status not clearly defined

b Age groups not clearly defined

c Immigrants were defined as the children of parents with long- term residence permit who entered Greece for family reunification. The remaining children, including refugees, asylum seekers or irregular migrants were defined as "refugees".

d Variable definitions of migrants between countries and between studies

Overall, the papers indicate that the health needs of children on the move are highly heterogeneous, depending on the conditions in the country of origin, during the journey, and after arrival in the countries of destination. Children separated or travelling unaccompanied (UASC) are particularly vulnerable to various forms of exploitation at all phases of their journey and after arrival. Structural, financial, language and cultural barriers in access to health care affect care-seeking behaviours as well as diagnostic evaluation, treatment, and health outcomes (Table 3).(5, 9, 46)

**Table 3. Barriers in access to care for children on the move**

|                                  |                                                                                                                  |                                                                                                                      |
|----------------------------------|------------------------------------------------------------------------------------------------------------------|----------------------------------------------------------------------------------------------------------------------|
| Information                      | Patients and families                                                                                            | Unfamiliar health system, lack of knowledge about where and how to seek care                                         |
|                                  |                                                                                                                  | Variable education and literacy, with variable knowledge about health                                                |
|                                  |                                                                                                                  | Lack of awareness about health rights                                                                                |
|                                  | Health professionals                                                                                             | Variable understanding of and experience with treating children on the move                                          |
|                                  |                                                                                                                  | Limited epidemiological data on the health status and context-specific risks of children on the move                 |
|                                  |                                                                                                                  | Lack of clear and readily available national guidance on the legal and practical aspects of health care for migrants |
| Culture and language differences | Language barriers, with limited or lack of access to medical interpreters                                        |                                                                                                                      |
|                                  | Differing cultural and health beliefs                                                                            |                                                                                                                      |
|                                  | Expectations for health care encounter may differ between the health professional and patient/family             |                                                                                                                      |
| Financial                        | Costs associated with care may include transport to health facility, treatment, medications and medical supplies |                                                                                                                      |
| Other barriers                   | Distance to health facility, transportation needed to access care                                                |                                                                                                                      |
|                                  | Multiple housing relocations                                                                                     |                                                                                                                      |
|                                  | Insufficient time allotted to appointments                                                                       |                                                                                                                      |
|                                  | Fear, including the fear that accessing care may affect asylum decision                                          |                                                                                                                      |
|                                  | Breakdown in trust between patients and health workers                                                           |                                                                                                                      |

### *Communicable diseases*

During travel and after arrival in Europe, children may be housed in overcrowded facilities with inadequate hygiene and sanitation conditions that place them at risk of communicable diseases. The most common infection sites include the respiratory tract, gastrointestinal tract and skin, with a concerning prevalence of parasitic and wound infections.(26, 35, 42, 51)

1  
2  
3 Children originating from low and middle income countries may have been exposed to  
4 infectious agents that are rare in high income countries in Europe.(12, 13, 19) Furthermore,  
5 exposure to armed conflict may increase their risk of exposure to infections.(43) Notable  
6 infections among populations on the move include latent or active tuberculosis (TB),(12, 31)  
7 malaria,(43) Hepatitis B and C,(12, 43), Syphilis(12), Human T-lymphotropic virus type 1 or  
8 2,(12) louse-borne relapsing fever,(16, 43) shigella,(43) and leishmaniasis(43). There is a  
9 notable lack of studies with age-disaggregated data on HIV prevalence among migrant  
10 children in Europe. A Spanish study which screened 358 children did not find any cases.(12)  
11 While children on the move are at risk for a number of different infections, the prevalence  
12 of communicable diseases varies markedly between groups and is thought to be heavily  
13 related to the conditions during travel and after migration.(43)  
14  
15  
16  
17  
18  
19

20 The treatment of children on the move with infectious diseases may require different  
21 regimens than those recommended by national protocols, as these children may be at  
22 higher risk of colonisation and infection with drug-resistant organisms. In Germany, routine  
23 screening practices at hospital admission have found that children on the move have higher  
24 rates of Multiple Drug Resistant (MDR) bacterial strains than the local population.(20) MDR  
25 Infections may be more difficult to treat, and carry higher morbidity and mortality risks.  
26  
27  
28  
29

30 Children on the move may need catch-up immunisations to match the vaccination schedule  
31 of the country of destination.(43) Several studies of children on the move in Europe have  
32 identified low vaccination coverage against hepatitis B, measles, mumps, rubella and  
33 varicella and low immunity to vaccine preventable diseases including tetanus and  
34 diphtheria: this is coupled with a higher prevalence of previous exposure to vaccine-  
35 preventable diseases.(47) Since 2015, cases of cutaneous diphtheria(43) and outbreaks of  
36 measles in the EU(38) have been attributed to insufficient vaccination coverage in migrant  
37 populations. Further, Hepatitis A cases have been reported in children living in camps and  
38 centres in Greece and Germany, with particularly high rates among children under 15  
39 years.(27, 28) There is no evidence of increased transmission of communicable diseases  
40 from migrants to host populations.(52)  
41  
42  
43  
44  
45  
46  
47  
48

#### 49 *Noncommunicable diseases and injuries*

50  
51 Displacement places children at risk for a broad variety of noncommunicable diseases and  
52 injuries that may be exacerbated by limited and irregular access to paediatric and neonatal  
53 health care. Paediatric groups that are particularly vulnerable include unaccompanied  
54 minors, pregnant adolescents, and infants.  
55  
56  
57

58 In 2017, more than half of the children arriving in Europe were registered in Greece, and the  
59 largest age group were infants and small children (0-4years old).(53) Infants born during the  
60



1  
2  
3 journey may be born without adequate access to prenatal, intra-partum, or postnatal care,  
4 resulting in increased birth complications, stillbirth, and infant mortality.(54) Further, these  
5 newborns may have lacked access to screening for congenital disorders that is routinely  
6 offered in European countries. Infant nutrition may suffer, particularly as breastfeeding is a  
7 challenge for mothers during their journey.(55) The evidence regarding the risk of birth  
8 complications in children born to mothers after arrival in the destination country is mixed.  
9 Some studies in Europe have shown that these infants have higher rates of birth  
10 complications, including hypothermia, infections, low birth weight, pre-term birth, and  
11 perinatal mortality when compared with the native population,(40, 51) while other studies  
12 have found that outcomes in certain countries are similar to the national populations.(37)  
13 These patterns suggest that the cause of altered risks may be related to society-specific  
14 factors such as integration policies, socioeconomic disadvantage among different migrant  
15 groups, and barriers in access to care.(37)

22 Traumatic events such as torture, sexual violence or kidnapping, may have long-lasting  
23 physical and psychological effects on a child. Physical trauma related to the journey and  
24 attempts at illegal border crossings may include skin lacerations, tendon lacerations,  
25 fractures, and muscle contusions. If left untreated and/or in unhygienic conditions, injuries  
26 may become infected, with severe and potentially life-threatening consequences.(42)  
27 People arriving by sea are particularly susceptible to injury and illness; a recent survey of  
28 rescue ships found that dehydration, and dermatological conditions associated with poor  
29 hygiene and crowded conditions were common, as well as new and old traumatic injuries  
30 from both violence and accidents.(25) The risk of female genital mutilation is high in girls  
31 from certain regions and is a recognised reason for seeking asylum.(10)

37 Nutritional deficiencies and dental problems are more common in children on the move,  
38 with reported prevalence of iron deficiency anaemia ranging from 4-18% among children  
39 living in Germany and Greece.(26, 32) Dental problems are perhaps the most prevalent  
40 health issue in children on the move, and indeed caries prevalence has been reported as  
41 high as 65% among migrant and refugee children in the UK.(50)

45 While the prevalence of noncommunicable chronic diseases in children on the move in the  
46 EU is not thought to differ significantly from host populations, there is little evidence to  
47 support this thinking. Further, the barriers in access to care and different health beliefs pose  
48 challenges to diagnosing and managing children on the move with chronic diseases (Table  
49 2).

### 55 *Psychosocial and mental health issues*

57 Children on the move are at high risk for psychosocial and mental health problems, with  
58 separated and unaccompanied children at highest risk. Direct and indirect exposure to  
59

1  
2  
3 traumatic events are associated with post-traumatic stress disorder (PTSD), anxiety,  
4 depression, sleep disturbances, and a broad range of internalising and externalising  
5 behaviours in refugee children.(44)  
6  
7

8  
9 The mental health of caregivers, especially mothers, plays an important role in their  
10 children's mental and physical health. Maternal PTSD and depression are correlated with  
11 increased risk of PTSD, PTS symptoms, behavioural problems and somatic complaints in  
12 their children.(49) Conversely, good caregiver mental health is a protective factor for the  
13 mental and behavioural health of refugee children.(44)  
14  
15

16  
17 Transit and host country reception policies also impact the mental health outcomes of  
18 children on the move. Numerous studies have documented that post-migration detention  
19 increases psychological symptoms and the prevalence of psychiatric illness in children on  
20 the move.(44) Detention, multiple relocations, prolonged asylum processes, and lack of  
21 child-friendly immigration procedures are associated with poor mental health outcomes in  
22 refugee children, and have been described in some studies as having placed the children in  
23 greater adverse situations than those which the children endured before migration.(44) A  
24 longitudinal study of refugee children from the Middle East living in Denmark found that  
25 psychological symptoms improved over time, with risk factors related to war and  
26 persecution being important during the early years after arrival in Denmark.(30) In the  
27 longer term, social factors in the country of origin were more important predictors of  
28 mental health.(30)  
29  
30  
31  
32  
33

34  
35 Racism and xenophobia play an important role in the psychological health and wellbeing of  
36 children on the move. Studies in Sweden and Denmark have found that the experience of  
37 discrimination is common among youth on the move and is associated with lower rates of  
38 social acceptance, poorer peer relations, and mental health problems.(21, 29) In a national  
39 survey of Swedish 9<sup>th</sup> graders, rates of bullying experienced by children on the move were  
40 associated with migrant density in schools, whereby children attending schools with low  
41 migrant density reported 3 times the rate of bullying compared with those attending  
42 schools with high migrant density.(21)  
43  
44  
45  
46  
47  
48

### 49 *Unaccompanied minors*

50  
51 The numbers of unaccompanied and separated children seeking asylum in Europe have  
52 increased in recent years. During 2015, 95,205, and in 2016, 63,245 UASC applied for asylum  
53 in the 28 EU member states, with Germany receiving about a third of these children.(56)  
54  
55

56  
57 The mental health of unaccompanied refugee adolescents during the first years of exile has  
58 been studied in several European epidemiological studies in recent years.(11, 14, 15, 17, 18,  
59 23, 24, 34, 36, 57) In the largest of these studies, a comparison was made between three  
60



1  
2  
3 groups: (1) newly arrived, unaccompanied children aged 12–18 years in the Netherlands, (2)  
4 young refugees of the same age who had arrived with their parents and (3) an age-matched  
5 Dutch group.(11) The unaccompanied youths had much higher levels of depressive  
6 symptoms than the accompanied refugee children (47 vs 27%), and this was partly  
7 explained by a higher burden of traumatic stress. Follow-up interviews 12 months later  
8 showed no indication of improvement. The level of externalizing symptoms and behaviour  
9 problems were, however, lower among the unaccompanied refugees than in the Dutch  
10 comparison population. A similar picture of high levels of traumatic stress and introverted  
11 symptoms was noted in a Norwegian study of 414 unaccompanied youth; of note, this study  
12 was carried out at an average of 3.5 years after their arrival in the country.(34)

### 19 *Age assessment*

21 Having an assumed chronological age above or below 18 years determines the support  
22 provided for young asylum seekers in most European countries, despite the fact that many  
23 lack documents with an exact birth date.(5) This has led to the use of many different  
24 methods to assess age in Europe. In the UK, social workers independent of the migration  
25 authorities undertake age assessment interviews which consider any documents or  
26 evidence indicating likely age, along with an assessment of appearance and demeanour.(58)  
27 Many other European countries rely on medical examinations, primarily in the form of  
28 radiographs of the hand/wrist (23 countries), collar bone (15 countries) and/or teeth (17  
29 countries).(59) The individual variation in age specific maturity in the later teens with these  
30 methods, and the unknown variation between high and low income countries, make them  
31 unsuitable for assessing whether a young person is below or above 18 years of age.(39, 41)

32  
33  
34  
35  
36  
37  
38  
39 The use of these imprecise methods raise serious ethical and human rights concerns and is  
40 often experienced as unfair and stressful by the young asylum seekers.(45) The European  
41 Academy of Paediatrics and several national medical associations have therefore  
42 recommended their members not to participate in age assessment procedures of asylum  
43 applicants on behalf of the state.(48)

### 47 *Health policies and child rights*

49 Identification of the health needs of an individual child on the move, and subsequent timely  
50 investigation and management may be suboptimal in the arrival countries for a plethora of  
51 reasons associated with legal status, health care system efficiencies, and individual factors.  
52 A recent survey identified 12 EU/EEA countries with significant inequities in health care  
53 entitlements for children on the move (compared to locally born children) according to their  
54 legal status.(7) In a number of countries, undocumented children only have access to  
55 emergency health care services.(60) Worryingly, in Sweden, a recent Human Rights Watch  
56 report found that children spend months without receiving health screening.(33)

1  
2  
3 In an analysis of health care policies for children on the move, Hjern et al (22) compared  
4 entitlements for asylum seeking and undocumented children in 31 EU member and EES  
5 states in 2016 with those of resident children. Only seven countries (*Belgium, France, Italy,*  
6 *Norway, Portugal, Spain and Sweden*) have met the obligations of non-discrimination in the  
7 CRC and entitled both these categories of migrants, irrespective of legal status, to receive  
8 equal health care to that of its nationals. Twelve European countries have limited  
9 entitlements to health care for asylum seeking children. Germany and Slovakia stand out as  
10 the EU countries with the most restrictive health care policies for refugee children.  
11  
12

13  
14  
15 In all but four countries in the EU/EEA there are systematic health examinations of newly  
16 settled migrants of some kind.(60) In most eastern European countries and Germany this  
17 health examination is mandatory; while in the rest of western and northern Europe it is  
18 voluntary. All countries that have a policy of health examination aim to identify  
19 communicable diseases, so as to protect the host population. Almost all countries with a  
20 voluntary policy also aim to identify the child's individual health care needs, but this is rarely  
21 the case in countries that have a mandatory policy.  
22  
23  
24  
25  
26  
27

## 28 Discussion

29  
30 Our review of the available evidence indicates that children on the move in Europe have  
31 particular health risks and needs that differ from both the local population as well as  
32 between migrant groups. The body of evidence from Europe remains limited, however, as it  
33 is based primarily on observational studies from individual countries, with few multi-country  
34 or intervention studies.  
35  
36

37  
38 A large body of evidence exists on the health needs and risks of children on the move  
39 outside of Europe, most notably in North America and Australia.(50, 61-63) The evidence  
40 from these areas indicates that the health determinants and patterns of risk are similar  
41 across settings; the specific health risks and needs of children are heavily dependent on the  
42 conditions before and during travel and after arrival. There are also patterns that are shared  
43 across high, middle and low income settings, such as children's risk of exposure to violence,  
44 risk of exploitation, and a high risk of mental health problems related to these two  
45 factors.(64) The similarities across regions suggest that, although context plays an important  
46 role for the individual child, there are certain health risks and needs shared by children on  
47 the move across the globe.  
48  
49  
50  
51

52  
53 In light of these similarities, findings from the literature in other parts of the world may help  
54 to fill in some of the existing gaps in the evidence in Europe. For example, there is little good  
55 quality evidence from Europe on the risk of injury during the early period after arrival to the  
56 country of destination. However, a large Canadian study found that refugee children have  
57 an increased risk of injury after resettlement. The study reported a 20% higher rate of  
58 unintentional injury in refugee youth compared with non-refugee immigrant youth for most  
59  
60

1  
2  
3 causes of injury, with notably higher rates of motor vehicle injuries, poisonings, suffocation,  
4 and scald burns.(65) However, to our knowledge, there are no studies that provide data on  
5 the prevalence of disability or its effect on the health and development of children on the  
6 move.  
7  
8

9  
10 There are important contextual factors that are likely to affect the health of children on the  
11 move differently across the world. Basic needs such as clean water, sanitation and food  
12 security may more profoundly influence child health and well-being in refugee camps in  
13 developing countries as compared with Europe. Other contextual factors may include the  
14 nature of rights violations, such as the large scale detention and separation of children on  
15 the move from their caregivers in the United States.(66, 67) Studies in Finnish children  
16 separated from their parents for a period during World War II found that these children  
17 exhibited altered stress physiology, earlier menarche, and lower scores on intelligence  
18 testing.(68-70) The interplay between common or widespread health risks, contextual  
19 factors, access to care, and health promotion activities is likely to play a major role in the  
20 ultimate health outcomes of children on the move in a given geographical area.  
21  
22  
23  
24  
25  
26  
27

### 28 *Access and quality of care*

29

30 Newly settled children have greater health needs than the average European child, however  
31 access to health care remains a major obstacle for them. Although there have been very few  
32 studies assessing access to health care by migrant families, it has been proposed that  
33 unfamiliar health care systems, and financial costs of over the counter medications pose  
34 specific challenges to the migrant family.(9) In the UK, UASC have their specific health needs  
35 identified as part of statutory health assessments, where the state has assumed the role of  
36 the corporate parent and undertakes the responsibility for the needs of the child. However,  
37 accompanied children (those children who arrive with and remain in the care of their  
38 migrant, refugee or asylum-seeking parent/s), depend upon their newly arrived parent(s) to  
39 negotiate unfamiliar health care systems.  
40  
41  
42  
43  
44

45 Other important barriers to care in Europe are similar to those found in other settings,  
46 including language barriers, lack of professional medical interpreters, and variable cultural  
47 competence of health personnel. Health workers may lack knowledge or experience in  
48 caring for children on the move, may be unaware of their health rights, and may lack  
49 guidance on the health needs and risks of the newly arrived population. The International  
50 Society for Social Pediatrics and Child Health released a position paper characterising these  
51 barriers and providing recommendations for health policy, health care, research and  
52 advocacy.(5) These recommendations are grounded in child rights, and can serve as a guide  
53 for individuals, groups and organisations seeking to improve the health and wellbeing of  
54 children on the move.  
55  
56  
57  
58  
59  
60

### *Mental health –a priority area*

The main health risks and the main challenge for health services for children on the move in Europe are in the domain of mental health. This review highlights an important knowledge gap in the evidence for programmes and policies that address early recognition and intervention, access to care, and the development of effective preventive services for mental health. There is an urgent need for research on the effect of interventions and policies intended to promote and protect the health, well-being and positive development of children on the move in Europe

The remarkable resilience observed among displaced children has been a topic of significant discourse and study.<sup>(5)</sup> Healthy and positive adaptive processes have been associated with social inclusion, supportive family environments, good caregiver mental health, and positive school experiences.<sup>(44, 71)</sup> Although the evidence base for interventions remains limited, research and experience suggest that the most effective way to protect and promote refugee child mental health is through comprehensive psychosocial interventions that address psychological suffering in the context of the child's family and environment; such interventions necessarily include family, education, and community needs and caregiver mental health.<sup>(72)</sup>

### **Conclusion**

Asylum seeking, refugee and undocumented children in Europe have significant health risks and needs that differ between groups and from children in the local population. Health policies across EU and EES member states vary widely, and children on the move in Europe face a broad range of barriers in access to care. The Convention on the Rights of the Child provides children with the right to access to health care without discrimination and to the conditions that promote optimal health and wellbeing. With children increasingly on the move, it is imperative that individuals and sectors that meet and work with these children are aware of their health risks and needs and are equipped to respond to them.

### **Authors' contributions**

The authors collectively identified the need for the paper. Ayesha Kadir designed and carried out the database searches. Nick Spencer, Anders Hjern and Ayesha Kadir screened titles and abstracts, and all authors screened full text papers. Ayesha Kadir, Anna Battersby, and Anders Hjern wrote sections of the first draft. Ayesha Kadir led development and compilation of the first draft and carried out subsequent revisions. All authors contributed to critical review of the drafts and to the development of the supporting tables and figures.

## Acknowledgements

The authors would like to thank the ISSOP Migration Working Group, whose work inspired this review paper.

## References

1. UNHCR. Global Trends: Forced displacement in 2017. Geneva: 2018. Accessed 11 July 2018. Available from: <http://www.unhcr.org/globaltrends2017/>.
2. UNICEF. Uprooted: The growing crisis for refugee and migrant children. UNICEF, 2016. Accessed 20 October 2016. Available from: <http://www.unicef.org/emergencies/childrenonthemove/uprooted/>.
3. EUROSTAT. Asylum statistics explained: 2017. 2018. Accessed 13 October 2018 Available from: [http://ec.europa.eu/eurostat/statistics-explained/index.php/Asylum\\_statistics](http://ec.europa.eu/eurostat/statistics-explained/index.php/Asylum_statistics).
4. UNHCR, UNICEF, IOM. Refugee and Migrant Children in Europe: Overview of Trends 2017: UNICEF; 2018. Accessed 13 October 2018. Available from: <https://www.unicef.org/eca/sites/unicef.org.eca/files/Infographic%20Children%20and%20UASC%20overview%202017.pdf>.
5. ISSOP Migration Working Group. ISSOP position statement on migrant child health. Child Care Health Dev. 2017;44(1):161-70.
6. Convention on the Rights of the Child, 1989. Available from: <http://www.ohchr.org/en/professionalinterest/pages/crc.aspx>.
7. Stubbe Østergaard L, Norredam M, Mock-Munoz de Luna C, et al. Restricted health care entitlements for child migrants in Europe and Australia. European Journal of Public Health. 2017;27(5):869-73.
8. IOM. International Migration Law: Glossary on Migration. 2004. Accessed 16 March 2017.
9. Alkahtani S, Cherrill J, Millward C, et al. Access to medicines by child refugees in the east midlands region of England: A cross-sectional study. BMJ Open. 2014;4(12):e006421.
10. Baillot H, Murray N, Connelly E, Howard N. Addressing female genital mutilation in Europe: a scoping review of approaches to participation, prevention, protection, and provision of services. International Journal for Equity in Health. 2018;17(1):21.
11. Bean TM, Eurelings-Bontekoe E, Spinhoven P. Course and predictors of mental health of unaccompanied refugee minors in the Netherlands: One year follow-up. Social Science and Medicine. 2007;64(6):1204-15.
12. Belhassen-Garcia M, Perez del Villar L, Pardo-Lledias J, et al. Imported transmissible diseases in minors coming to Spain from low-income areas. Clinical Microbiology and Infection. 2015;21(4):370.e5-.e8.
13. Bennet R, Eriksson M. Tuberculosis infection and disease in the 2015 cohort of unaccompanied minors seeking asylum in Northern Stockholm, Sweden. Infectious Diseases. 2017;49(7):501-6.
14. Bronstein I, Montgomery P, Dobrowolski S. PTSD in asylum-seeking male adolescents from Afghanistan. Journal of Traumatic Stress. 2012;25(5):551-7.
15. Bronstein I, Montgomery P, Ott E. Emotional and behavioural problems amongst Afghan unaccompanied asylum-seeking children: results from a large-scale cross-sectional study. European Child and Adolescent Psychiatry. 2013;22(5):285-94.
16. Ciervo A, Mancini F, di Bernardo F, et al. Louseborne relapsing fever in young migrants, Sicily, Italy, July-September 2015. Emerging Infectious Diseases. 2016;22(1):152-3.
17. Derluyn I, Broekaert E. Different perspectives on emotional and behavioural problems in unaccompanied refugee children and adolescents. Ethnicity and Health. 2007;12(2):141-62.

18. Derluyn I, Broekaert E. Unaccompanied refugee children and adolescents: the glaring contrast between a legal and a psychological perspective. *International Journal of Law and Psychiatry*. 2008;31(4):319-30.
19. Hatleberg CI, Prah J, Rasmussen JN, et al. A review of paediatric tuberculosis in Denmark: 10 year trend, 2000-2009. *European Respiratory Journal*. 2014;43:863-71.
20. Heudorf U, Krackhardt B, Karathana M, Kleinkauf N, Zinn C. Multidrug-resistant bacteria in unaccompanied refugee minors arriving in Frankfurt am Main, Germany, October to November 2015. *Eurosurveillance*. 2016;21(2):pii=30109.
21. Hjern A, Rajmil L, Bergstrom M, et al. Migrant density and well-being-a national school survey of 15-year-olds in Sweden. *European Journal of Public Health*. 2013;23(5):823-8.
22. Hjern A, Ostergaard LS, Norredam M, de Luna CMM, Goldfeld S. Health policies for migrant children in Europe and Australia. *The Lancet*. 2017;389(10066):249.
23. Hodes M, Jagdev D, Chandra N, Cunniff A. Risk and resilience for psychological distress amongst unaccompanied asylum seeking adolescents. *Journal of Child Psychology and Psychiatry and Allied Disciplines*. 2008;49(7):723-32.
24. Huemer J, Karnik N, Voelkl-Kernstock S, et al. Psychopathology in African unaccompanied refugee minors in Austria. *Child Psychiatry and Human Development*. 2011;42(3):307-19.
25. Kulla M, Josse F, Stierholz M, et al. Initial assessment and treatment of refugees in the Mediterranean Sea (a secondary data analysis concerning the initial assessment and treatment of 2656 refugees rescued from distress at sea in support of the EUNAVFOR MED relief mission of the EU). *Scandinavian journal of trauma, resuscitation and emergency medicine*. 2016;24:75.
26. Marquardt L, Kramer A, Fischer F, Pruffer-Kramer L. Health status and disease burden of unaccompanied asylum-seeking adolescents in Bielefeld, Germany: cross-sectional pilot study. *Tropical Medicine and International Health*. 2016;21(2):210-8.
27. Mellou K, Christostomou A, Sideroglou T, et al. Hepatitis A among refugees, asylum seekers and migrants living in hosting facilities, Greece, April to December 2016. *Eurosurveillance*. 2017;22(4):30448.
28. Michaelis K, Wenzel JJ, Stark K, Faber M. Hepatitis A virus infections and outbreaks in asylum seekers arriving to Germany, September 2015 to March 2016. *Emerging Microbes and Infections*. 2017;6(4):e26.
29. Montgomery E, Foldspang A. Discrimination, mental problems and social adaptation in young refugees. *European Journal of Public Health*. 2008;18(2):156-61.
30. Montgomery E. Trauma and resilience in young refugees: a 9-year follow-up study. *Development and Psychopathology*. 2010;22(2):477-89.
31. Odone A, Tillmann T, Sandgren A, et al. Tuberculosis among migrant populations in the European Union and the European Economic Area. *The European Journal of Public Health*. 2015;25(3):506-12.
32. Pavlopoulou ID, Tanaka M, Dikaloti S, et al. Clinical and laboratory evaluation of new immigrant and refugee children arriving in Greece. *BMC Pediatrics*. 2017;17(1):132.
33. Riddell R. Seeking Refuge: Unaccompanied Childre in Sweden. Human Rights Watch, 2016. Accessed 19 July 2018. Available from: [https://www.hrw.org/sites/default/files/report\\_pdf/sweden0616web\\_1.pdf](https://www.hrw.org/sites/default/files/report_pdf/sweden0616web_1.pdf).
34. Seglem KB, Oppedal B, Raeder S. Predictors of depressive symptoms among resettled unaccompanied refugee minors. *Scandinavian Journal of Psychology*. 2011;52(5):457-64.
35. Van Berlaer G, Carbonell FB, Manantsoa S, et al. A refugee camp in the centre of Europe: Clinical characteristics of asylum seekers arriving in Brussels. *BMJ Open*. 2016;6(11):e013963.
36. Vervliet M, Lammertyn J, Broekaert E, Derluyn I. Longitudinal follow-up of the mental health of unaccompanied refugee minors. *European Child and Adolescent Psychiatry*. 2014;23(5):337-46.
37. Villadsen SF, Sievers E, Andersen AM, et al. Cross-country variation in stillbirth and neonatal mortality in offspring of Turkish migrants in northern Europe. *European Journal of Public Health*. 2010;20(5):530-5.



- 1
  - 2
  - 3
  - 4
  - 5
  - 6
  - 7
  - 8
  - 9
  - 10
  - 11
  - 12
  - 13
  - 14
  - 15
  - 16
  - 17
  - 18
  - 19
  - 20
  - 21
  - 22
  - 23
  - 24
  - 25
  - 26
  - 27
  - 28
  - 29
  - 30
  - 31
  - 32
  - 33
  - 34
  - 35
  - 36
  - 37
  - 38
  - 39
  - 40
  - 41
  - 42
  - 43
  - 44
  - 45
  - 46
  - 47
  - 48
  - 49
  - 50
  - 51
  - 52
  - 53
  - 54
  - 55
  - 56
  - 57
  - 58
  - 59
  - 60
38. Williams GA, Bacci S, Shadwick R, et al. Measles among migrants in the European Union and the European Economic Area. *Scandinavian Journal of Public Health*. 2016;44(1):6-13.
39. Aynsley-Green A, Cole TJ, Crawley H, et al. Medical, statistical, ethical and human rights considerations in the assessment of age in children and young people subject to immigration control. *British Medical Bulletin*. 2012;102:17-42.
40. Bollini P, Pampallona S, Wanner P, Kupelnick B. Pregnancy outcome of migrant women and integration policy: A systematic review of the international literature. *Social Science & Medicine*. 2009;68(3):452-61.
41. Cole TJ. The evidential value of developmental age imaging for assessing age of majority. *Annals of Human Biology*. 2015;42(4):379-88.
42. Devi S. Unaccompanied migrant children at risk across Europe. *Lancet*. 2016;387(10038):2590.
43. Eiset AH, Wejse C. Review of infectious diseases in refugees and asylum seekers—current status and going forward. *Public Health Reviews*. 2017;38:22.
44. Fazel M, Reed RV, Panter-Brick C, Stein A. Mental health of displaced and refugee children resettled in high-income countries: risk and protective factors. *Lancet*. 2012;379(9812):266-82.
45. Hjern A, Ascher H, Vervliet M. Age assessment of young asylum seekers – science or deterrence? In: Semovilla D, editor. *Handbook of research with unaccompanied children*. *In press*.
46. Markkula N, Cabieses B, Lehti V, et al. Use of health services among international migrant children – a systematic review. *Globalization and Health*. 2018;14:52.
47. Mipatrini D, Stefanelli P, Severoni S, Rezza G. Vaccinations in migrants and refugees: a challenge for European health systems. A systematic review of current scientific evidence. *Pathogens and Global Health*. 2017;111(2):59-68.
48. Sauer PJ, Nicholson A, Neubauer D, Advocacy and Ethics Group of the European Academy of Paediatrics. Age determination in asylum seekers: physicians should not be implicated. *European Journal of Pediatrics*. 2016;175(3):299-303.
49. Slone M, Mann S. Effects of War, Terrorism and Armed Conflict on Young Children: A Systematic Review. *Child Psychiatry and Human Development*. 2016;47(6):950-65.
50. Williams B, Cassar C, Siggers G, Taylor S. Medical and social issues of child refugees in Europe. *Archives of Disease in Childhood*. 2016;101(9):839-42.
51. Noori T. Assessing the burden of key infectious diseases affecting migrant populations in the EU/EEA. Stockholm: European Centre for Disease Prevention and Control, 2014. Accessed 8 June 2018. Available from: <https://ecdc.europa.eu/sites/portal/files/media/en/publications/Publications/assessing-burden-disease-migrant-populations.pdf>.
52. World Health Organization. Migration and communicable diseases: no systematic association. Copenhagen, 2017. Accessed 8 June 2018. Available from: <http://www.euro.who.int/en/health-topics/health-determinants/migration-and-health/migrant-health-in-the-european-region/migration-and-health-key-issues#292117>.
53. UNICEF. Refugee and Migrant Crisis in Europe: Humanitarian Situation Report No. 28. Accessed 16 August 2018. Available from: <https://www.unicef.org/eca/sites/unicef.org.eca/files/sitreprandm.pdf>.
54. Keygnaert I, Ivanova O, Guieu A, et al. What is the Evidence on the Reduction of Inequalities in Accessibility and Quality of Maternal Health Care Delivery for Migrants? A Review of the Existing Evidence in the WHO European Region. Copenhagen: World Health Organization; 2016.
55. IOM, UNICEF. Data Brief: Migration of Children to Europe 2015. Accessed 5 December 2016. Available from: [http://www.iom.int/sites/default/files/press\\_release/file/IOM-UNICEF-Data-Brief-Refugee-and-Migrant-Crisis-in-Europe-30.11.15.pdf](http://www.iom.int/sites/default/files/press_release/file/IOM-UNICEF-Data-Brief-Refugee-and-Migrant-Crisis-in-Europe-30.11.15.pdf).
56. EUROSTAT. Asylum applicants considered to be unaccompanied minors 2017. Accessed 19 November 2018. Available from: [http://appsso.eurostat.ec.europa.eu/nui/show.do?dataset=migr\\_asyunaa&lang=en](http://appsso.eurostat.ec.europa.eu/nui/show.do?dataset=migr_asyunaa&lang=en) . .

- 1
- 2
- 3
- 4 57. Derluyn I, Broekaert E, Schuyten G. Emotional and behavioural problems in migrant
- 5 adolescents in Belgium. *European Child and Adolescent Psychiatry*. 2008;17(1):54-62.
- 6 58. Busler D, Cowell K, Johnson H, Kane J. Age Assessment Guidance: Guidance to assist social
- 7 workers and their managers in undertaking age assessments in England. Association of Directors of
- 8 Children's Services, 2015. Accessed 13 October 2018. Available from:
- 9 [http://adcs.org.uk/assets/documentation/Age\\_Assessment\\_Guidance\\_2015\\_Final.pdf](http://adcs.org.uk/assets/documentation/Age_Assessment_Guidance_2015_Final.pdf).
- 10 59. European Asylum Support Office. Age assessment practice in Europe. European Asylum
- 11 Support Office, 2014. Accessed 1 March 2017. Available from:
- 12 [https://www.easo.europa.eu/sites/default/files/public/EASO-Age-assessment-practice-in-](https://www.easo.europa.eu/sites/default/files/public/EASO-Age-assessment-practice-in-Europe1.pdf)
- 13 [Europe1.pdf](https://www.easo.europa.eu/sites/default/files/public/EASO-Age-assessment-practice-in-Europe1.pdf).
- 14 60. Hjern A, Stubbe-Østergaard L. Migrant children in Europe: Entitlements to health care.
- 15 London: EU Commission, 2016. Available from: [http://www.childhealthservicemodels.eu/wp-](http://www.childhealthservicemodels.eu/wp-content/uploads/2015/09/20160831_Deliverable-D3-D7.1_Migrant-children-in-Europe.pdf)
- 16 [content/uploads/2015/09/20160831\\_Deliverable-D3-D7.1\\_Migrant-children-in-Europe.pdf](http://www.childhealthservicemodels.eu/wp-content/uploads/2015/09/20160831_Deliverable-D3-D7.1_Migrant-children-in-Europe.pdf).
- 17 61. Chilton LA, Handal GA, Paz-Soldan GJ, Council on Community Pediatrics. Providing care for
- 18 immigrant, migrant, and border children. *Pediatrics*. 2013;131(6):e2028-e34.
- 19 62. Pottie K, Greenaway C, Feightner J, et al. Evidence-based clinical guidelines for immigrants
- 20 and refugees. *Canadian Medical Association Journal*. 2011;183(12):e824-e925.
- 21 63. Foundation House. Promoting Refugee Health: A guide for doctors, nurses and other health
- 22 care providers caring for people from refugee backgrounds. 3rd ed. Melbourne: Foundation House;
- 23 2012.
- 24 64. Reed RV, Fazel M, Jones L, Panter-Brick C, Stein A. Mental health of displaced and refugee
- 25 children resettled in low-income and middle-income countries: risk and protective factors. *Lancet*.
- 26 2012;379(9812):250-65.
- 27 65. Saunders NR, Macpherson A, Guan J, Guttman A. Unintentional injuries among refugee and
- 28 immigrant children and youth in Ontario, Canada: a population-based cross-sectional study. *Injury*
- 29 *Prevention*. 2017;24(5):337-43.
- 30 66. Linton JM, Griffin M, Shapiro AJ. Detention of Immigrant Children. *Pediatrics*.
- 31 2017;139(5):pii: e20170483.
- 32 67. Kraft C. AAP Statement on Executive Order on Family Separation: American Academy of
- 33 Pediatrics; 2018. Accessed 8 October 2018. Available from: [https://www.aap.org/en-us/about-the-](https://www.aap.org/en-us/about-the-aap/aap-press-room/Pages/AAP-Statement-on-Executive-Order-on-Family-Separation.aspx)
- 34 [aap/aap-press-room/Pages/AAP-Statement-on-Executive-Order-on-Family-Separation.aspx](https://www.aap.org/en-us/about-the-aap/aap-press-room/Pages/AAP-Statement-on-Executive-Order-on-Family-Separation.aspx).
- 35 68. Pesonen AK, Raikkonen K, Feldt K, et al. Childhood separation experience predicts HPA axis
- 36 hormonal responses in late adulthood: a natural experiment of World War II.
- 37 *Psychoneuroendocrinology*. 2010;35(5):758-67.
- 38 69. Pesonen AK, Raikkonen K, Heinonen K, et al. Reproductive traits following a parent-child
- 39 separation trauma during childhood: a natural experiment during World War II. *American Journal of*
- 40 *Human Biology*. 2008;20(3):345-51.
- 41 70. Pesonen A-K, Räikkönen K, Kajantie E, et al. Intellectual ability in young men separated
- 42 temporarily from their parents in childhood. *Intelligence*. 2011;39(5):335-41.
- 43 71. Betancourt TS, Khan KT. The mental health of children affected by armed conflict: protective
- 44 processes and pathways to resilience. *International Review of Psychiatry*. 2008;20(3):317-28.
- 45 72. Fazel M, Betancourt TS. Preventive mental health interventions for refugee children and
- 46 adolescents in high-income settings. *The Lancet Child & Adolescent Health*. 2018;2(2):121-32.
- 47
- 48
- 49
- 50
- 51
- 52
- 53
- 54
- 55
- 56
- 57
- 58
- 59
- 60



1  
2  
3  
4  
5  
6  
7  
8  
9  
10  
11  
12  
13  
14  
15  
16  
17  
18  
19  
20  
21  
22  
23  
24  
25  
26  
27  
28  
29  
30  
31  
32  
33  
34  
35  
36  
37  
38  
39  
40  
41  
42  
43  
44  
45  
46  
47  
48  
49  
50  
51  
52  
53  
54  
55  
56  
57  
58  
59  
60

Identification  
Screening  
Eligibility  
Included

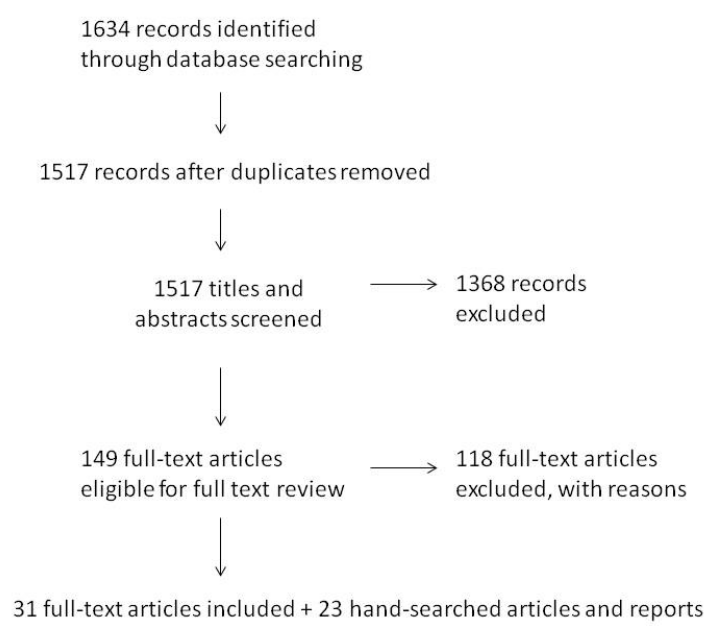

254x190mm (96 x 96 DPI)

# BMJ Paediatrics Open

## **Children on the move in Europe: A narrative review of the evidence on the health risks, health needs, and health policy for asylum seeking, refugee and undocumented children**

|                               |                                                                                                                                                                                                                                                                                                                                                                              |
|-------------------------------|------------------------------------------------------------------------------------------------------------------------------------------------------------------------------------------------------------------------------------------------------------------------------------------------------------------------------------------------------------------------------|
| Journal:                      | <i>BMJ Paediatrics Open</i>                                                                                                                                                                                                                                                                                                                                                  |
| Manuscript ID                 | bmjpo-2018-000364.R2                                                                                                                                                                                                                                                                                                                                                         |
| Article Type:                 | Original article                                                                                                                                                                                                                                                                                                                                                             |
| Date Submitted by the Author: | 02-Jan-2019                                                                                                                                                                                                                                                                                                                                                                  |
| Complete List of Authors:     | Kadir, Ayesha; Malmo Hogskola, Malmö Institute for Studies of Migration, Diversity and Welfare<br>Battersby, Anna; Kaleidoscope Centre for Children and Young People, Lewisham and Greenwich NHS Trust, London<br>Spencer, Nick; University of Warwick Warwick Medical School, Division of Mental Health and Wellbeing<br>Hjern, Anders; Centre for Health Equity Studies, ; |
| Keywords:                     | Children's Rights, General Paediatrics                                                                                                                                                                                                                                                                                                                                       |
|                               |                                                                                                                                                                                                                                                                                                                                                                              |

SCHOLARONE™  
Manuscripts

1  
2  
3 **Children on the move in Europe: A narrative review of the evidence on the health risks,**  
4 **health needs, and health policy for asylum seeking, refugee and undocumented children**  
5  
6  
7  
8

9 Ayesha Kadir\*, Anna Battersby, Nick Spencer, Anders Hjern  
10

11  
12  
13 Ayesha Kadir

14 Institute for Studies of Migration, Diversity and Welfare  
15 Malmö University  
16 Niagara  
17 205 06 Malmö  
18 Sweden  
19 [kadira@gmail.com](mailto:kadira@gmail.com)  
20  
21 Tel: +45 53 45 85 62  
22

23  
24 Anna Battersby

25 Kaleidoscope Centre for Children and Young People  
26 Lewisham and Greenwich NHS Trust  
27 London  
28 UK  
29

30  
31  
32 Nick Spencer

33 Emeritus Professor of Child Health  
34 Division of Mental Health and Wellbeing  
35 Warwick Medical School, University of Warwick,  
36 Coventry CV4 9JD  
37 UK  
38  
39

40 Anders Hjern

41 Clinical Epidemiology,  
42 Department of Medicine,  
43 Karolinska Institutet and Centre for Health Equity Studies (CHESS), Karolinska  
44 Institutet/Stockholm University.  
45 Stockholm,  
46 Sweden  
47  
48  
49  
50

51 **Key words:** Child health, migration, child rights, social determinants of health, asylum  
52  
53 seeker, refugee, unaccompanied child, undocumented child  
54  
55  
56  
57  
58  
59  
60

1  
2  
3 **Abstract**  
4  
5

6 **Background:** Europe has experienced a marked increase in the number of children on the  
7 move. The evidence on the health risks and needs of migrant children is  
8 primarily from North America and Australia.  
9

10 **Objective:** To summarise the literature and identify the major knowledge gaps on the  
11 health risks and needs of asylum seeking, refugee, and undocumented  
12 children in Europe in the early period after arrival, and the ways in which  
13 European health policies respond to these risks and needs.  
14  
15

16 **Design:** Literature searches were undertaken in PubMed and EMBASE for studies on  
17 migrant child health in Europe from 1 January 2007 - 8 August 2017. The  
18 database searches were complemented by hand searches for peer-reviewed  
19 papers and grey literature reports.  
20

21 **Results:** The health needs of children on the move in Europe are highly  
22 heterogeneous and depend on the conditions before travel, during the  
23 journey, and after arrival in the country of destination. Although the bulk of  
24 the recent evidence from Europe is on communicable diseases, the major  
25 health risks for this group are in the domain of mental health, where  
26 evidence regarding effective interventions is scarce. Health policies across EU  
27 and EES member states vary widely, and children on the move in Europe  
28 continue to face structural, financial, language and cultural barriers in access  
29 to care that affect child health care and outcomes.  
30  
31  
32  
33

34 **Conclusions:** Asylum seeking, refugee and undocumented children in Europe have  
35 significant health risks and needs that differ from children in the local  
36 population. Major knowledge gaps were identified regarding interventions  
37 and policies to treat and to promote the health and wellbeing of children on  
38 the move.  
39  
40

41  
42  
43 **Funding:** This research received no specific grant from any funding agency in the  
44 public, commercial or not-for-profit sectors.  
45  
46  
47  
48  
49  
50  
51  
52  
53  
54  
55  
56  
57  
58  
59  
60

## Introduction

Forced displacement is a major child health issue worldwide. More than 13 million children live as refugees or asylum seekers outside their country of birth.(1) Conservative estimates suggest that nearly 180,000 children on the move are unaccompanied or separated from their caregivers.(1) The majority of these children live in Asia, the Middle East, and Africa.(2)

Europe has experienced a marked increase in the number of irregular migrants since 2011, with a peak in arrivals during 2015.(3) Children have accounted for a large proportion of people making the journey, either with family or on their own, in search of safety, stability and a better future. Between 2015 and 2017, more than 1 million asylum applications were made for children in Europe.(3) The majority of these children originated from Syria, Iraq and Afghanistan.(2) In 2017, 70% of the 210,000 asylum claims made for children in Europe were filed in Germany, France, Greece and Italy.(4)

The phenomenon of migration to Europe has been characterised by continual evolution; with frequent changes in the most common migration routes, modes of travel, and the length of stay in transit countries. Children making these dangerous and often prolonged journeys are exposed to considerable health risks. The health of children on the move is related to their health status before the journey, conditions in transit and after arrival, and is influenced by experience of trauma, the health of their caregivers, and their ability to access health care.(5)

Much of the literature on the health of children on the move comes from North America and Australia. In light of the marked increase in the number of children arriving in Europe and the need for improved understanding of the situation for these children in the European context, this paper reviews the health risks and needs of children on the move in Europe and how European health policies respond to these risks and needs. It is important to note that children may live for months or years in one or several countries before settling, being repatriated, or going underground. In the longer term, factors such as the social determinants of health, ethnicity, and issues relating to legal status and prolonged periods of transit begin to take precedence.

**What is known**

- Europe has experienced a significant increase in migration of displaced people escaping humanitarian crises
- Displaced children are known to be vulnerable to violence, violation of their rights and discrimination
- The existing literature on the health of children on the move in Europe is largely focused on infectious disorders
- The Convention on the Rights of the Child provides children on the move with the right to the conditions that promote optimal health and wellbeing and with access to health care without discrimination

**What this study adds**

- Indicates that the main challenges for child health services lie in the domain of mental health and wellbeing
- Indicates that many children on the move in Europe are insufficiently vaccinated
- Identifies significant gaps in knowledge, particularly with regards to policies and interventions to promote child health and wellbeing
- Identifies research priorities to promote effective, ethical care and support health policy

The Convention on the Rights of the Child (CRC) affords all children with the right to health care without discrimination.<sup>(6)</sup> Articles 2, 9, 20, 22, 30 and 39 devote specific attention to the rights of displaced and unaccompanied children.<sup>(6)</sup> As such, the CRC provides a useful framework to address the health of children on the move.

Terms such as migrants, refugees and asylum seekers are often used interchangeably and may shift the focus away from people toward political discourse. In this paper, we focus on asylum seeking, refugee and undocumented children (Table 1). Undocumented children are included because they are known to be a mobile and highly marginalised group, with particular barriers in access to services. We use the term “children on the move” for these three groups of children in order to maintain a rights-based focus.

**Table 1. Definitions**

|                              |                                                                                                                                                                                                                                                                                                                          |
|------------------------------|--------------------------------------------------------------------------------------------------------------------------------------------------------------------------------------------------------------------------------------------------------------------------------------------------------------------------|
| <i>Child</i>                 | Person under the age of 18 years.(6)                                                                                                                                                                                                                                                                                     |
| <i>Asylum seeker</i>         | Persons or children of such persons who are in the process of applying for refugee status under the 1951 Geneva Refugee Convention.(7)                                                                                                                                                                                   |
| <i>Refugee</i>               | A person, who "owing to well-founded fear of persecution for reasons of race, religion, nationality, membership of a particular social group or political opinions, is outside the country of his nationality and is unable or, owing to such fear, is unwilling to avail himself of the protection of that country".(8) |
| <i>Undocumented children</i> | Children who live without a residence permit, have overstayed visas or have refused immigration applications and who have not left the territory of the destination country subsequent to receipt of an expulsion order or children passing through or residing temporarily in a country without seeking asylum.(7)      |
| <i>Unaccompanied minors</i>  | Children who have been separated from both parents and other relatives and are not being cared for by any adult.                                                                                                                                                                                                         |

## Methods

The findings presented in this review are based on a comprehensive literature search of studies on the health of children on the move in Europe from 1 January 2007- 8 August 2017. Searches were run in PubMed and EMBASE on 8 August 2017. Search terms included combinations of terms for children such as "child", "youth", and "adolescent" with terms for migrant, such as "migrant", "asylum seeker", "refugee" and "undocumented migrant", and with terms for countries in the European Union as well as five countries that are major origin and transit countries for children travelling to Europe, including Afghanistan, Jordan, Lebanon, Syria, and Turkey. The database searches were limited to papers providing data on children (birth-18 years) in the English language. Papers were included if they addressed physical and mental health of children on the move, health examinations of these children, the effect of caregiver mental health, access to care, or disparities in care between children on the move and the local population. Multi-regional reviews that provided data on children in Europe were also included. Papers on adult populations (defined as a study population  $\geq 18$  years) that did not provide disaggregated data on children were excluded. However, papers including UASC with a stated age  $\leq 19$  years were included, as well as longitudinal cohort studies that followed migrant children into early adulthood ( $< 24$  years old). Additional exclusion criteria included special populations, small single-facility studies, lack of migrant and/or health focus, intervention studies that did not provide data on child health outcomes, and papers from non-European host countries. Commentaries and conference abstracts were excluded. For further information on specific child health and policy topics, hand searches were also undertaken to identify relevant peer-reviewed papers and grey literature reports.



## Patient and Public Involvement

No patients were involved in this study.

## Results

The searches identified 1634 records. After removing 117 duplicates, 1517 titles were screened. 149 papers were reviewed in full text review, of which 118 papers were excluded. Our final sample included 31 papers. An additional 23 articles and reports were identified by the hand searches (Figure 1: Flow diagram). Tables 2 and 3 provide an overview of the 45 original research studies and review papers that are included in this review.

### Figure 1: Flow diagram

**Tables 2 and 3. Tables of included studies (does not include grey literature reports unless they provided data from original research)**

**Table 2. Original research articles**

| First author and year     | Country | Study population                               | Study design                          | Sample size (children only) | Summary of findings                                                                                                                                                                                                                                                                                                                                                                                                                                                                                                                            |
|---------------------------|---------|------------------------------------------------|---------------------------------------|-----------------------------|------------------------------------------------------------------------------------------------------------------------------------------------------------------------------------------------------------------------------------------------------------------------------------------------------------------------------------------------------------------------------------------------------------------------------------------------------------------------------------------------------------------------------------------------|
| Huemer, J(9) (2011)       | Austria | African UASC 15-18 years old                   | Observational cohort                  | 41                          | 56% of African UASC had at least one mental health diagnosis by structured clinical interview. The most common diagnoses were adjustment disorder, PTSD and dysthymia.                                                                                                                                                                                                                                                                                                                                                                         |
| Derluyn, I(10) (2007)     | Belgium | UASC(a)                                        | Cross-sectional survey                | 142                         | Between 37 and 47% of the unaccompanied refugee youths had severe or very severe symptoms of anxiety, depression and post-traumatic stress when screened with the Hopkins Symptoms Checklist 37A. Girls and those having experienced many traumatic events are at even higher risk for the development of these emotional problems.                                                                                                                                                                                                            |
| Derluyn, I(11) (2008)     | Belgium | Migrant and native adolescents 10-21 years     | Cross-sectional survey                | 1,249 migrant / 602 native  | Migrant adolescents experienced more traumatic events than their Belgian peers and showed higher levels of peer problems and avoidance symptoms. Non-migrant adolescents demonstrated more symptoms of anxiety, externalizing problems and hyperactivity. Factors influencing the prevalence of emotional and behavioural problems were the number of traumatic events experienced, gender and the living situation.                                                                                                                           |
| Van Berlaer, G(12) (2016) | Belgium | Asylum seekers                                 | Single facility cross-sectional study | 391                         | Primarily reported outcomes in adults. Nearly half of asylum seekers, & two-thirds of children <5 years suffered from infections. Among children <5 years, 50% had respiratory diseases (n=76), 20% digestive disorders (n=30), 14% skin disorders (n=21) & 7% suffered from injuries (n=10).                                                                                                                                                                                                                                                  |
| Vervliet, M(13) (2014)    | Belgium | UASC 14-17 years old                           | Longitudinal cohort                   | 103                         | UASC reported an average of 7.5 traumatic experiences at the study start. The mean number of reported daily stressors increased over the study period. Participants had high scores for anxiety, depression and internalizing symptoms. There were no significant differences in mental health scores over time. The number of traumatic experiences and the number of daily stressors were associated with significantly higher symptom levels of depression (daily stressors), anxiety and PTSD (traumatic experiences and daily stressors). |
| Hatleberg, CI(14) (2014)  | Denmark | Children <15 years old in Denmark              | Epidemiological surveillance study    | 323                         | 323 TB cases were reported in children aged <15 years in Denmark between 2000 and 2009. The incidence of childhood TB declined from 4.1 per 100 000 to 1.9 per 100 000 during the study period. Immigrant children comprised 79.6% of all cases. Among Danish children, the majority were <5 years and had a known TB exposure. Pulmonary TB was the most common presentation.                                                                                                                                                                 |
| Montgomery, E(15) (2008)  | Denmark | Refugees 11-23 years old                       | Longitudinal cohort                   | 131                         | Follow up study in refugee children after 9 years. Participants reported a mean of 1.8 experiences of discrimination. An association was found between discrimination, psychological problems and social adaptation. Perceived discrimination predicted internalizing behaviours. Social adaptation was protective, correlating negatively with discrimination as well as externalizing and internalizing behaviours.                                                                                                                          |
| Montgomery, E(16) (2010)  | Denmark | Refugees 11-23 years old                       | Longitudinal cohort                   | 131                         | Same population as Montgomery (2007). Upon arrival, the children experienced high rates of clinically significant psychological problems which reduced markedly at 9 year follow up. Persistent symptoms were associated with higher number of types of stressful events after arrival, suggesting environmental factors play an important role in resilience and recovery from psychological trauma.                                                                                                                                          |
| Heudorf, U(17) (2016)     | Germany | UASC <18 years old                             | Observational cohort                  | 119                         | UASC arriving in Frankfurt during October-November 2015 had high levels of drug resistant microbial flora. Enterobacteriaceae with extended spectrum beta-lactamases (ESBL) were detected in 42 of 119 (35%) youth. 9 youth had flora with additional resistance to fluoroquinolones (8% of total screened).                                                                                                                                                                                                                                   |
| Kulla, M(18) (2016)       | Germany | Refugee infants and children(a) rescued at sea | Observational cohort                  | 293                         | Among the 2656 refugees rescued by a German Naval Force frigate between May – September 2015, 19 (0.7 %) were infants and 274 (10.3 %) were children. 27% of all patients required treatment by a physician due to injury or illness & were defined as "sick". One infant (5.2%) & 38 children (13.9%) were identified as sick. Predominant diagnoses were dermatological diseases, internal diseases and trauma.                                                                                                                              |
| Marquardt, I(19) (2016)   | Germany | UASC 12-18 years old                           | Cross-sectional survey                | 102                         | Pilot study that employed purpose sampling for a non-representative subset of UASC in Bielefeld, Germany. 59% of the youth had at least one infection, and 20% suffered parasitic infections. 13.7% were diagnosed with mental illness. 17.6% were found to have iron deficiency anaemia. Overall, the youth had a low prevalence of non-communicable diseases (<2.0%).                                                                                                                                                                        |
| Michaelis, K(20) (2017)   | Germany | Asylum seekers with Hepatitis A                | Epidemiological surveillance study    | 231                         | Asylum seeking children 5-9 years old accounted for 97 of 278 (35%) reported HAV cases among asylum seekers during September 2015 to March 2016. The predominant subgenotype was IB, a strain previously reported in the Middle East, Turkey, Pakistan and East Africa. There was one case of transmission from an asymptomatic child to a nursery nurse working in a mass accommodation centre.                                                                                                                                               |

|                                |                 |                                                                                 |                                                                                   |                            |                                                                                                                                                                                                                                                                                                                                                                                                                                                                                                    |
|--------------------------------|-----------------|---------------------------------------------------------------------------------|-----------------------------------------------------------------------------------|----------------------------|----------------------------------------------------------------------------------------------------------------------------------------------------------------------------------------------------------------------------------------------------------------------------------------------------------------------------------------------------------------------------------------------------------------------------------------------------------------------------------------------------|
| Mellou, K(21) (2017)           | Greece          | Refugees, asylum seekers and migrants(b) living in hosting facilities in Greece | Observational study                                                               | 152                        | Report on Hepatitis A Virus (HAV) infection among refugees in hosting facilities in Greece April - December 2016. A total of 177 cases were found, of which 152 were in children <15 years old.                                                                                                                                                                                                                                                                                                    |
| Pavlopoulou, ID(22) (2017)     | Greece          | Migrant and refugee(c) children 1-14 years old                                  | Single facility prospective cross-sectional study                                 | 300                        | Survey of immigrant and refugee children presenting for health examination within 3 months of their arrival, May 2010, and March 2013. The main health problems found included unknown vaccination status (79.3%), elevated blood lead levels (30.6%), dental problems (21.3%), eosinophilia (22.7%), and anaemia (13.7%). 8 children (2.7%) were diagnosed with latent tuberculosis based on Mantoux and chest x-ray, and 2 cases were confirmed with QuantiFERON-TB Gold testing.                |
| Ciervo, A(23) (2016)           | Italy           | Asylum seeking adolescents <18 years                                            | Case series                                                                       | 3                          | Description of Louse-borne relapsing fever in three Somali adolescents who were seeking asylum.                                                                                                                                                                                                                                                                                                                                                                                                    |
| Bean, TM(24) (2007)            | The Netherlands | UASC <18 years old                                                              | Prospective cohort study                                                          | 582                        | The self-reported psychological distress of refugee minors was found to be severe (50%) and of a chronic nature (stable for one year) and was confirmed by reports from the guardians (33%) and teachers (36%). The number of self-reported adverse life events was strongly related to the severity of psychological distress.                                                                                                                                                                    |
| Seglem, KB(25) (2011)          | Norway          | UASC                                                                            | Cross-sectional survey                                                            | 414                        | Surveyed of UASC who were granted a residence permit in Norway from 2000 - 2009. The youth ranged from 11 -27 years at the time of the survey. The study found that UASC are a high-risk group for mental health problems also after resettlement in a new country, with high prevalence of depression and PTSD.                                                                                                                                                                                   |
| Belhassen-Garcia, M(26) (2015) | Spain           | Immigrant children and young people(b) <18 years old                            | Observational cohort                                                              | 373                        | Immigrants <18 years of age coming from Sub-Saharan Africa, North Africa and Latin America were prospectively screened between January 2007 and December 2011. Latent tuberculosis was found in 12.7% (36/285), Active TB infection in 1% (3/285), HBV in 4.3% (15/350), and HCV in 2.35% (8/346). None (0/358) were HIV positive.                                                                                                                                                                 |
| Bennet, R(27) (2017)           | Sweden          | UASC <18 years old                                                              | Observational cohort                                                              | 2422                       | 2422 UASC were screened for tuberculosis with a Mantoux tuberculin skin test or a QuantiFERON-TB Gold. 349 had a positive test, of which 16 had TB disease and 278 latent tuberculosis infections (LTBI). Children originating from the horn of Africa had high prevalence of latent TB and TB disease.                                                                                                                                                                                            |
| Hjern, A(28) (2013)            | Sweden          | Migrant and native 15 year-olds                                                 | Cross-sectional survey                                                            | 76,229                     | In a national survey using the KIDSCREEN instrument, the psychological wellbeing in foreign-born children from Africa and Asia was found to be much lower (-0.8 in Z-scores) compared with the majority population if the student body consisted mainly of native students from the majority population. Scores were very similar to the majority population in schools where at least 50% had two foreign-born parents. Bullying explained much of this difference.                               |
| Riddel, R(29) (2016)           | Sweden          | UASC 9-18 years old                                                             | Qualitative interviews                                                            | 53                         | The youth described experience of extreme violence and exploitation, as well as lack of access to physical and mental health care. They describe lengthy asylum procedures, delays in receiving a guardian, lack of access to interpreters and inexperienced and inadequately trained staff among guardians in the accommodation centres. Girls and younger children reported being housed with older boys and experiencing bullying and harassment in their accommodation facilities.             |
| Alkahtani, S(30) (2014)        | England         | Refugee children in the East Midlands compared with native controls             | Case-control                                                                      | 117 migrant / 99 native    | Comparison made between the children of 50 refugee parents (N=117 children) with children of 50 English parents (N=99 children), with median ages 5 and 4 years, respectively. Refugee children were more likely to receive prescribed medicines during the previous month (p=0.008) and 6 months (p<0.001) than English children and were less likely to receive over the counter (OTC) medicines in the past 6 months (p=0.009). The findings suggest financial barrier in access to medication. |
| Bronstein, I(31) (2012)        | United Kingdom  | Afghan UASC 13-18 years                                                         | Cross-sectional survey                                                            | 222                        | One third of youth were found to score above the cut-off on a validated PTSD-screening instrument.                                                                                                                                                                                                                                                                                                                                                                                                 |
| Bronstein, I(32) (2013)        | United Kingdom  | Afghan UASC 13-18 years                                                         | Cross-sectional survey                                                            | 222                        | In a survey using the Hopkins Symptoms Checklist 37A, 31.4% scored above cut-offs for emotional and behavioural problems, 34.6% for anxiety and 23.4% for depression. Scores increased with time after arrival in the UK and load of premigration traumatic events.                                                                                                                                                                                                                                |
| Hodes, M(33) (2008)            | United Kingdom  | UASC (13-18 years old) and accompanied refugee children (13-19 years old)       | Cross-sectional survey                                                            | 78 UASC and 35 accompanied | UASC had experienced high levels of traumatic events (mean of 6.8 events, range 0-16), and reported high levels of posttraumatic stress symptoms compared with accompanied children. Predictors of high posttraumatic symptoms included low-support living arrangements, female gender, and experience of trauma. Among UASC, posttraumatic symptoms increased with age. High depressive scores were associated with female gender, and region of origin in UASC.                                  |
| Baillot, H(34) (2018)          | Multiple        | Asylum seekers                                                                  | Literature review, in-depth interviews with experts in EU-based FGM interventions | N/A                        | FGM is an important basis for asylum claims girls and women in Europe. Monitoring and interventions vary between countries. There are no pooled data, however, as variations in reporting practices between countries preclude the evaluation or monitoring of FGM-based asylum claims in the EU.                                                                                                                                                                                                  |

|    |                                      |          |                                                                              |                                                                                                |         |                                                                                                                                                                                                                                                                                                                                                                                                                                                                                                                                                                                                 |
|----|--------------------------------------|----------|------------------------------------------------------------------------------|------------------------------------------------------------------------------------------------|---------|-------------------------------------------------------------------------------------------------------------------------------------------------------------------------------------------------------------------------------------------------------------------------------------------------------------------------------------------------------------------------------------------------------------------------------------------------------------------------------------------------------------------------------------------------------------------------------------------------|
| 1  |                                      |          |                                                                              |                                                                                                |         |                                                                                                                                                                                                                                                                                                                                                                                                                                                                                                                                                                                                 |
| 2  |                                      |          |                                                                              |                                                                                                |         |                                                                                                                                                                                                                                                                                                                                                                                                                                                                                                                                                                                                 |
| 3  |                                      |          |                                                                              |                                                                                                |         |                                                                                                                                                                                                                                                                                                                                                                                                                                                                                                                                                                                                 |
| 4  |                                      |          |                                                                              |                                                                                                |         |                                                                                                                                                                                                                                                                                                                                                                                                                                                                                                                                                                                                 |
| 5  | Odone, A(35)<br>(2015)               | Multiple | Migrants to the EU(b)                                                        | Literature review, analysis of European Surveillance System data, and information from experts | N/A     | Primarily reported outcomes in adults. From 2000 - 2009, 15.3% of reported paediatric TB cases in the EU/EEA were of foreign origin. This figure is lower than the proportion of foreign-born reported TB cases in the overall population (26%). Norway, Sweden and Austria reported a higher number of foreign-origin TB cases than native-origin TB cases among children <15 years. Risk-based analysis is limited because surveillance data in most EU/EEA countries do not distinguish between children born in the host country to foreign-born parents from those born to native parents. |
| 6  |                                      |          |                                                                              |                                                                                                |         |                                                                                                                                                                                                                                                                                                                                                                                                                                                                                                                                                                                                 |
| 7  |                                      |          |                                                                              |                                                                                                |         |                                                                                                                                                                                                                                                                                                                                                                                                                                                                                                                                                                                                 |
| 8  |                                      |          |                                                                              |                                                                                                |         |                                                                                                                                                                                                                                                                                                                                                                                                                                                                                                                                                                                                 |
| 9  |                                      |          |                                                                              |                                                                                                |         |                                                                                                                                                                                                                                                                                                                                                                                                                                                                                                                                                                                                 |
| 10 | Stubbe<br>Østergaard,<br>L(7) (2017) | Multiple | Asylum seekers and undocumented migrant children <18 years                   | Survey and desk review                                                                         | N/A     | Surveyed child health professionals, NGOs and European Ombudspersons for Children in 30 EU/EEA countries and Australia and reviewed official documents. Entitlements for asylum seeking, refugee and irregular migrants in the EU are variable, however only five countries (France, Italy, Norway, Portugal and Spain) explicitly entitle all migrant children, irrespective of legal status, to receive equal health care to that of its nationals. The needs of irregular migrants from other EU countries are often overlooked in European health care policy.                              |
| 11 |                                      |          |                                                                              |                                                                                                |         |                                                                                                                                                                                                                                                                                                                                                                                                                                                                                                                                                                                                 |
| 12 |                                      |          |                                                                              |                                                                                                |         |                                                                                                                                                                                                                                                                                                                                                                                                                                                                                                                                                                                                 |
| 13 |                                      |          |                                                                              |                                                                                                |         |                                                                                                                                                                                                                                                                                                                                                                                                                                                                                                                                                                                                 |
| 14 | Villadsen,<br>SF(36) (2010)          | Multiple | Stillbirths and neonatal deaths of infants born to mothers of Turkish origin | Retrospective prevalence study                                                                 | 239,387 | Includes data from 9 EU countries. The stillbirth rates were higher in infants born to Turkish mothers than in the native population in all countries. The neonatal mortality was variable, with elevated risks for infants of Turkish mothers in Denmark, Switzerland, Austria and Germany, and lower rates in Netherlands, the United Kingdom and Norway when compared to the native populations.                                                                                                                                                                                             |
| 15 |                                      |          |                                                                              |                                                                                                |         |                                                                                                                                                                                                                                                                                                                                                                                                                                                                                                                                                                                                 |
| 16 |                                      |          |                                                                              |                                                                                                |         |                                                                                                                                                                                                                                                                                                                                                                                                                                                                                                                                                                                                 |
| 17 |                                      |          |                                                                              |                                                                                                |         |                                                                                                                                                                                                                                                                                                                                                                                                                                                                                                                                                                                                 |
| 18 | Williams,<br>GA(37) (2016)           | Multiple | Migrants(d)                                                                  | Literature review, survey of 30 countries, and information from experts                        | N/A     | National surveillance systems do not systematically record migration-specific information. Experts attributed measles outbreaks to low vaccination coverage or particular health or religious beliefs, and considered outbreaks related to migration to be infrequent. The literature review and country survey suggested that some measles outbreaks in the EU/EEA were due to sub-optimal vaccination coverage in migrant populations.                                                                                                                                                        |
| 19 |                                      |          |                                                                              |                                                                                                |         |                                                                                                                                                                                                                                                                                                                                                                                                                                                                                                                                                                                                 |
| 20 |                                      |          |                                                                              |                                                                                                |         |                                                                                                                                                                                                                                                                                                                                                                                                                                                                                                                                                                                                 |
| 21 |                                      |          |                                                                              |                                                                                                |         |                                                                                                                                                                                                                                                                                                                                                                                                                                                                                                                                                                                                 |
| 22 | Hjern, A(38)<br>(2017)               | EU27     | Migrant children <18 years                                                   | Cross-sectional survey to clinicians, national child ombudsmen and NGOs                        | N/A     | Seven EU countries (Belgium, France, Italy, Norway, Portugal and Spain and Sweden) explicitly entitle all non-EU migrant children, irrespective of legal status, to receive equal health care to that of its nationals. Twelve European countries have limited entitlements to health care for asylum seeking children, including Germany that stands out as the country with the most restrictive health care policy for migrant children. The needs of irregular migrants from other EU countries are often overlooked in European health care policy.                                        |
| 23 |                                      |          |                                                                              |                                                                                                |         |                                                                                                                                                                                                                                                                                                                                                                                                                                                                                                                                                                                                 |
| 24 |                                      |          |                                                                              |                                                                                                |         |                                                                                                                                                                                                                                                                                                                                                                                                                                                                                                                                                                                                 |
| 25 |                                      |          |                                                                              |                                                                                                |         |                                                                                                                                                                                                                                                                                                                                                                                                                                                                                                                                                                                                 |
| 26 |                                      |          |                                                                              |                                                                                                |         |                                                                                                                                                                                                                                                                                                                                                                                                                                                                                                                                                                                                 |

a Age groups not clearly defined

b Migrant status not clearly defined

c Immigrants were defined as the children of parents with long-term residence permit who entered Greece for family reunification. The remaining children, including refugees, asylum seekers or irregular migrants were defined as "refugees".

d Variable definitions of migrants between countries and between studies

**Table 3. Review articles**

| 37                             | 38                                                 | 39                                                                  | 40                                   | 41                                                                                                                                                                                                                                                                                                                                                 | 42 |
|--------------------------------|----------------------------------------------------|---------------------------------------------------------------------|--------------------------------------|----------------------------------------------------------------------------------------------------------------------------------------------------------------------------------------------------------------------------------------------------------------------------------------------------------------------------------------------------|----|
| First author and year          | Study population                                   | Study design                                                        | Sample size (children only)          | Summary of findings                                                                                                                                                                                                                                                                                                                                |    |
| 41                             | 42                                                 | 43                                                                  | 44                                   | 45                                                                                                                                                                                                                                                                                                                                                 | 46 |
| Aynsley-Green, A(39)<br>(2012) | Refugee & asylum-seeking children and young people | Review without information on search strategy or inclusion criteria | N/A                                  | Evidence that X-ray examination of bones & teeth is imprecise and unethical and should not be used. Further research needed on a holistic multi-disciplinary approach to age assessment.                                                                                                                                                           |    |
| 45                             | 46                                                 | 47                                                                  | 48                                   | 49                                                                                                                                                                                                                                                                                                                                                 | 50 |
| Bollini, P(40) (2009)          | Immigrant women(a) who delivered an infant Europe  | Systematic review and meta-analysis                                 | 18,322,978 pregnancies in 65 studies | 61 studies were cross-sectional design and 27 were from single facilities. Compared data on 1.6 million in immigrant women with 16.7 million native women. Immigrant women had 43% higher risk of low birth weight, 24% of pre-term delivery, 50% of perinatal mortality, and 61% of congenital malformations compared with native European women. |    |
| 49                             | 50                                                 | 51                                                                  | 52                                   | 53                                                                                                                                                                                                                                                                                                                                                 | 54 |
| Cole, TJ(41) (2015)            | UASC                                               | Review article of methods for age assessment                        | N/A                                  | Most individuals are mature before age 18 in hand-wrist X-rays. On MRI of the wrist and orthopantomogram of the third molar, the mean age of attainment is over 19 years, however if there is immature appearance, these methods are uninformative about likely age; as such, the MRI and third molars have high specificity but low sensitivity.  |    |
| 53                             | 54                                                 | 55                                                                  | 56                                   | 57                                                                                                                                                                                                                                                                                                                                                 | 58 |
| Derluyn, I(11) (2008)          | UASC                                               | Review without information on search strategy or inclusion criteria | N/A                                  | UASC are a vulnerable population with considerable need for psychological support and therefore need a strong and stable reception system. The creation of such a system would be greatly facilitated if the legal system considered them children first and refugees/migrants second.                                                             |    |
| 57                             | 58                                                 | 59                                                                  | 60                                   |                                                                                                                                                                                                                                                                                                                                                    |    |
| Devi, S(42) (2016)             | UASC                                               | Opinion piece                                                       | N/A                                  | Summarises findings on infectious diseases affecting unaccompanied minors based on two UNICEF and one Human Rights Watch reports.                                                                                                                                                                                                                  |    |

|                                         |                                                                                 |                                                                     |                                       |                                                                                                                                                                                                                                                                                                                                                                                                                                                                                                                                                                                   |
|-----------------------------------------|---------------------------------------------------------------------------------|---------------------------------------------------------------------|---------------------------------------|-----------------------------------------------------------------------------------------------------------------------------------------------------------------------------------------------------------------------------------------------------------------------------------------------------------------------------------------------------------------------------------------------------------------------------------------------------------------------------------------------------------------------------------------------------------------------------------|
| Eiset AH(43) (2017)                     | Refugees and asylum seekers - all ages                                          | Narrative review                                                    | Not specified                         | 51 studies of infectious conditions in refugees and asylum seekers including children and adults. Findings related to children: limited evidence on infectious diseases among refugee and asylum-seeking children; relatively low vaccination rates with one study showing 52.5% of migrant children needing triple vaccine and 13.2% needing MMR and a further study showing low levels of rubella immunity among refugee children. The review reports on rates of TB, HIV, hepatitis B and C, malaria and less common infections; however, rates are not reported by age group. |
| Fazel, M(44) (2012)                     | Refugee children and young people                                               | Systematic review                                                   | 5776 children and youth in 44 studies | Exposure to violence, both direct and indirect (through parents), are important risk factors for adverse mental health outcomes in refugee children and adolescents. Protective factors include being accompanied by an adult caregiver, experiencing stable settlement, and social support in the host country.                                                                                                                                                                                                                                                                  |
| Hjern, A(45) (In Press)                 | UASC                                                                            | Narrative review                                                    | N/A                                   | Many UASC come from 'failed states' like Somalia and Afghanistan where official documents with exact birth dates are rarely issued. No currently available medical method has the accuracy needed to replace such documents. Unclear guidelines and arbitrary practices may lead to alarming shortcomings in the protection of this high-risk group of children and adolescents in Europe. Medical participation, as well as non-participation, in these dubious decisions raises a number of ethical questions.                                                                  |
| ISSOP Migration Working Group(5) (2017) | Migrant children in Europe                                                      | Narrative review and position statement                             | N/A                                   | Based on a comprehensive literature search and a rights-based approach, policy statement identifies magnitude of specific health and social problems affecting migrant children in Europe and recommends action by government and professionals to help every migrant child to achieve their potential to live a happy and healthy life, by preventing disease, providing appropriate medical treatment and supporting social rehabilitation.                                                                                                                                     |
| Markkula, N(46) (2018)                  | First and second generation migrant children compared with non-migrant children | Systematic review                                                   | 10,030,311 children in 93 studies     | 57% of included studies were from Europe and 36% from North America. Use of non-emergency healthcare services was less common among migrant compared with non-migrant children: in 19/27 studies reporting on general access to care, 9/19 reporting on vaccine uptake, 9/16 reporting on mental health service use, 9/14 reporting on oral health service use, 10/14 reporting on primary care and other service use. Migrant children were reported to be more likely to use Emergency and Hospital services in 9/15 studies.                                                   |
| Mipatrini D(47) (2017)                  | Migrants and refugees                                                           | Systematic review                                                   | N/A                                   | The study reports primarily on data in adults or where age classification is not specified. Overall, migrants and refugees were found to have lower immunization rates compared with European-born individuals. Studies in migrant children found lower rates of MMR, Polio and tetanus vaccination. Reasons cited include low vaccination coverage in the country of origin and barriers in access to care in Europe.                                                                                                                                                            |
| Sauer, PJ(48) (2016)                    | UASC                                                                            | Editorial/Position statement                                        | N/A                                   | Position statement by the European Academy of Paediatrics outlining medical, ethical and legal reasons for recommending that physicians should not participate in age determination of unaccompanied and separated children seeking asylum.                                                                                                                                                                                                                                                                                                                                       |
| Slone, M(49) (2016)                     | Children aged 0-6 years exposed to war, terrorism or armed conflict             | Systematic review                                                   | 4365 children in 35 studies           | Young children suffer from substantial distress including elevated Risk for PTSD or PTS symptoms, non-specific behavioural and emotional reactions and disturbance of sleep and play rituals. Parental and children's psychopathology correlated and family environment and parental functioning moderates exposure-outcome association for children. The authors conclude that longitudinal studies are needed to describe the developmental trajectories of exposed children.                                                                                                   |
| Williams, B(50) (2016)                  | Refugee children in Europe                                                      | Review without information on search strategy or inclusion criteria | N/A                                   | Increased rates of depression, anxiety disorders and PTSD among refugee children, as well as high levels of dental decay and low immunisation coverage.                                                                                                                                                                                                                                                                                                                                                                                                                           |

Overall, the papers indicate that the health needs of children on the move are highly heterogeneous, depending on the conditions in the country of origin, during the journey, and after arrival in the countries of destination. Children separated or travelling unaccompanied (UASC) are particularly vulnerable to various forms of exploitation at all phases of their journey and after arrival. Structural, financial, language and cultural barriers in access to health care affect care-seeking behaviours as well as diagnostic evaluation, treatment, and health outcomes (Table 4).<sup>(5, 30, 46)</sup>

**Table 4. Barriers in access to care for children on the move**

|                                  |                                                                                                                  |                                                                                                                      |
|----------------------------------|------------------------------------------------------------------------------------------------------------------|----------------------------------------------------------------------------------------------------------------------|
| Information                      | Patients and families                                                                                            | Unfamiliar health system, lack of knowledge about where and how to seek care                                         |
|                                  |                                                                                                                  | Variable education and literacy, with variable knowledge about health                                                |
|                                  |                                                                                                                  | Lack of awareness about health rights                                                                                |
|                                  | Health professionals                                                                                             | Variable understanding of and experience with treating children on the move                                          |
|                                  |                                                                                                                  | Limited epidemiological data on the health status and context-specific risks of children on the move                 |
|                                  |                                                                                                                  | Lack of clear and readily available national guidance on the legal and practical aspects of health care for migrants |
| Culture and language differences | Language barriers, with limited or lack of access to medical interpreters                                        |                                                                                                                      |
|                                  | Differing cultural and health beliefs                                                                            |                                                                                                                      |
|                                  | Expectations for health care encounter may differ between the health professional and patient/family             |                                                                                                                      |
| Financial                        | Costs associated with care may include transport to health facility, treatment, medications and medical supplies |                                                                                                                      |
| Other barriers                   | Distance to health facility, transportation needed to access care                                                |                                                                                                                      |
|                                  | Multiple housing relocations                                                                                     |                                                                                                                      |
|                                  | Insufficient time allotted to appointments                                                                       |                                                                                                                      |
|                                  | Fear, including the fear that accessing care may affect asylum decision                                          |                                                                                                                      |
|                                  | Breakdown in trust between patients and health workers                                                           |                                                                                                                      |

### *Communicable diseases*

During travel and after arrival in Europe, children may be housed in overcrowded facilities with inadequate hygiene and sanitation conditions that place them at risk of communicable diseases. The most common infection sites include the respiratory tract, gastrointestinal tract and skin, with a concerning prevalence of parasitic and wound infections.<sup>(12, 19, 42, 51)</sup>



1  
2  
3 Children originating from low and middle income countries may have been exposed to  
4 infectious agents that are rare in high income countries in Europe.(14, 26, 27) Furthermore,  
5 exposure to armed conflict may increase their risk of exposure to infections.(43) Notable  
6 infections among populations on the move include latent or active tuberculosis (TB),(26, 35)  
7 malaria,(43) Hepatitis B and C,(26, 43), Syphilis(26), Human T-lymphotropic virus type 1 or  
8 2,(26) louse-borne relapsing fever,(23, 43) shigella,(43) and leishmaniasis(43). There is a  
9 notable lack of studies with age-disaggregated data on HIV prevalence among migrant  
10 children in Europe. A Spanish study which screened 358 children did not find any cases.(26)  
11 While children on the move are at risk for a number of different infections, the prevalence  
12 of communicable diseases varies markedly between groups and is thought to be heavily  
13 related to the conditions during travel and after migration.(43)  
14  
15  
16  
17  
18  
19

20 The treatment of children on the move with infectious diseases may require different  
21 regimens than those recommended by national protocols, as these children may be at  
22 higher risk of colonisation and infection with drug-resistant organisms. In Germany, routine  
23 screening practices at hospital admission have found that children on the move have higher  
24 rates of Multiple Drug Resistant (MDR) bacterial strains than the local population.(17) MDR  
25 Infections may be more difficult to treat, and carry higher morbidity and mortality risks.  
26  
27  
28  
29

30 Children on the move may need catch-up immunisations to match the vaccination schedule  
31 of the country of destination.(43) Several studies of children on the move in Europe have  
32 identified low vaccination coverage against hepatitis B, measles, mumps, rubella and  
33 varicella and low immunity to vaccine preventable diseases including tetanus and  
34 diphtheria: this is coupled with a higher prevalence of previous exposure to vaccine-  
35 preventable diseases.(47) Since 2015, cases of cutaneous diphtheria(43) and outbreaks of  
36 measles in the EU(37) have been attributed to insufficient vaccination coverage in migrant  
37 populations. Further, Hepatitis A cases have been reported in children living in camps and  
38 centres in Greece and Germany, with particularly high rates among children under 15  
39 years.(20, 21) There is no evidence of increased transmission of communicable diseases  
40 from migrants to host populations.(52)  
41  
42  
43  
44  
45  
46  
47  
48

#### 49 *Noncommunicable diseases and injuries*

50  
51 Displacement places children at risk for a broad variety of noncommunicable diseases and  
52 injuries that may be exacerbated by limited and irregular access to paediatric and neonatal  
53 health care. Paediatric groups that are particularly vulnerable include unaccompanied  
54 minors, pregnant adolescents, and infants.  
55  
56  
57

58 In 2017, more than half of the children arriving in Europe were registered in Greece, and the  
59 largest age group were infants and small children (0-4years old).(53) Infants born during the  
60



1  
2  
3 journey may be born without adequate access to prenatal, intra-partum, or postnatal care,  
4 resulting in increased birth complications, stillbirth, and infant mortality.(54) Further, these  
5 newborns may have lacked access to screening for congenital disorders that is routinely  
6 offered in European countries. Infant nutrition may suffer, particularly as breastfeeding is a  
7 challenge for mothers during their journey.(55) The evidence regarding the risk of birth  
8 complications in children born to mothers after arrival in the destination country is mixed.  
9 Some studies in Europe have shown that these infants have higher rates of birth  
10 complications, including hypothermia, infections, low birth weight, pre-term birth, and  
11 perinatal mortality when compared with the native population,(40, 51) while other studies  
12 have found that outcomes in certain countries are similar to the national populations.(36)  
13 These patterns suggest that the cause of altered risks may be related to society-specific  
14 factors such as integration policies, socioeconomic disadvantage among different migrant  
15 groups, and barriers in access to care.(36)

22 Traumatic events such as torture, sexual violence or kidnapping, may have long-lasting  
23 physical and psychological effects on a child. Physical trauma related to the journey and  
24 attempts at illegal border crossings may include skin lacerations, tendon lacerations,  
25 fractures, and muscle contusions. If left untreated and/or in unhygienic conditions, injuries  
26 may become infected, with severe and potentially life-threatening consequences.(42)  
27 People arriving by sea are particularly susceptible to injury and illness; a recent survey of  
28 rescue ships found that dehydration, and dermatological conditions associated with poor  
29 hygiene and crowded conditions were common, as well as new and old traumatic injuries  
30 from both violence and accidents.(18) The risk of female genital mutilation is high in girls  
31 from certain regions and is a recognised reason for seeking asylum.(34)

37 Nutritional deficiencies and dental problems are more common in children on the move,  
38 with reported prevalence of iron deficiency anaemia ranging from 4-18% among children  
39 living in Germany and Greece.(19, 22) Dental problems are perhaps the most prevalent  
40 health issue in children on the move, and indeed caries prevalence has been reported as  
41 high as 65% among migrant and refugee children in the UK.(50)

45 While the prevalence of noncommunicable chronic diseases in children on the move in the  
46 EU is not thought to differ significantly from host populations, there is little evidence to  
47 support this thinking. Further, the barriers in access to care and different health beliefs pose  
48 challenges to diagnosing and managing children on the move with chronic diseases (Tables 2  
49 and 3).

### 55 *Psychosocial and mental health issues*

57 Children on the move are at high risk for psychosocial and mental health problems, with  
58 separated and unaccompanied children at highest risk. Direct and indirect exposure to  
59  
60

1  
2  
3 traumatic events are associated with post-traumatic stress disorder (PTSD), anxiety,  
4 depression, sleep disturbances, and a broad range of internalising and externalising  
5 behaviours in refugee children.(44)  
6  
7

8  
9 The mental health of caregivers, especially mothers, plays an important role in their  
10 children's mental and physical health. Maternal PTSD and depression are correlated with  
11 increased risk of PTSD, PTS symptoms, behavioural problems and somatic complaints in  
12 their children.(49) Conversely, good caregiver mental health is a protective factor for the  
13 mental and behavioural health of refugee children.(44)  
14  
15

16  
17 Transit and host country reception policies also impact the mental health outcomes of  
18 children on the move. Numerous studies have documented that post-migration detention  
19 increases psychological symptoms and the prevalence of psychiatric illness in children on  
20 the move.(44) Detention, multiple relocations, prolonged asylum processes, and lack of  
21 child-friendly immigration procedures are associated with poor mental health outcomes in  
22 refugee children, and have been described in some studies as having placed the children in  
23 greater adverse situations than those which the children endured before migration.(44) A  
24 longitudinal study of refugee children from the Middle East living in Denmark found that  
25 psychological symptoms improved over time, with risk factors related to war and  
26 persecution being important during the early years after arrival in Denmark.(16) In the  
27 longer term, social factors in the country of origin were more important predictors of  
28 mental health.(16)  
29  
30  
31  
32  
33

34  
35 Racism and xenophobia play an important role in the psychological health and wellbeing of  
36 children on the move. Studies in Sweden and Denmark have found that the experience of  
37 discrimination is common among youth on the move and is associated with lower rates of  
38 social acceptance, poorer peer relations, and mental health problems.(15, 28) In a national  
39 survey of Swedish 9<sup>th</sup> graders, rates of bullying experienced by children on the move were  
40 associated with migrant density in schools, whereby children attending schools with low  
41 migrant density reported 3 times the rate of bullying compared with those attending  
42 schools with high migrant density.(28)  
43  
44  
45  
46  
47  
48

### 49 *Unaccompanied minors*

50  
51 The numbers of unaccompanied and separated children seeking asylum in Europe have  
52 increased in recent years. During 2015, 95,205, and in 2016, 63,245 UASC applied for asylum  
53 in the 28 EU member states, with Germany receiving about a third of these children.(56)  
54  
55

56  
57 The mental health of unaccompanied refugee adolescents during the first years of exile has  
58 been studied in several European epidemiological studies in recent years.(9-11, 13, 24, 25,  
59 31-33, 57) In the largest of these studies, a comparison was made between three groups:  
60

1  
2  
3 (1) newly arrived, unaccompanied children aged 12–18 years in the Netherlands, (2) young  
4 refugees of the same age who had arrived with their parents and (3) an age-matched Dutch  
5 group.(24) The unaccompanied youths had much higher levels of depressive symptoms than  
6 the accompanied refugee children (47 vs 27%), and this was partly explained by a higher  
7 burden of traumatic stress. Follow-up interviews 12 months later showed no indication of  
8 improvement. The level of externalizing symptoms and behaviour problems were, however,  
9 lower among the unaccompanied refugees than in the Dutch comparison population. A  
10 similar picture of high levels of traumatic stress and introverted symptoms was noted in a  
11 Norwegian study of 414 unaccompanied youth; of note, this study was carried out at an  
12 average of 3.5 years after their arrival in the country.(25)  
13  
14  
15  
16  
17  
18  
19

### 20 *Age assessment*

21  
22 Having an assumed chronological age above or below 18 years determines the support  
23 provided for young asylum seekers in most European countries, despite the fact that many  
24 lack documents with an exact birth date.(5) This has led to the use of many different  
25 methods to assess age in Europe. In the UK, social workers independent of the migration  
26 authorities undertake age assessment interviews which consider any documents or  
27 evidence indicating likely age, along with an assessment of appearance and demeanour.(58)  
28 Many other European countries rely on medical examinations, primarily in the form of  
29 radiographs of the hand/wrist (23 countries), collar bone (15 countries) and/or teeth (17  
30 countries).(59) The individual variation in age specific maturity in the later teens with these  
31 methods, and the unknown variation between high and low income countries, make them  
32 unsuitable for assessing whether a young person is below or above 18 years of age.(39, 41)  
33  
34  
35  
36  
37  
38

39 The use of these imprecise methods raise serious ethical and human rights concerns and is  
40 often experienced as unfair and stressful by the young asylum seekers.(45) The European  
41 Academy of Paediatrics and several national medical associations have therefore  
42 recommended their members not to participate in age assessment procedures of asylum  
43 applicants on behalf of the state.(48)  
44  
45  
46  
47

### 48 *Health policies and child rights*

49  
50 Identification of the health needs of an individual child on the move, and subsequent timely  
51 investigation and management may be suboptimal in the arrival countries for a plethora of  
52 reasons associated with legal status, health care system efficiencies, and individual factors.  
53 A recent survey identified 12 EU/EEA countries with significant inequities in health care  
54 entitlements for children on the move (compared to locally born children) according to their  
55 legal status.(7) In a number of countries, undocumented children only have access to  
56 emergency health care services.(60) Worryingly, in Sweden, a recent Human Rights Watch  
57 report found that children spend months without receiving health screening.(29)  
58  
59  
60

1  
2  
3 In an analysis of health care policies for children on the move, Hjern et al (38) compared  
4 entitlements for asylum seeking and undocumented children in 31 EU member and EES  
5 states in 2016 with those of resident children. Only seven countries (*Belgium, France, Italy,*  
6 *Norway, Portugal, Spain and Sweden*) have met the obligations of non-discrimination in the  
7 CRC and entitled both these categories of migrants, irrespective of legal status, to receive  
8 equal health care to that of its nationals. Twelve European countries have limited  
9 entitlements to health care for asylum seeking children. Germany and Slovakia stand out as  
10 the EU countries with the most restrictive health care policies for refugee children.  
11  
12

13  
14  
15 In all but four countries in the EU/EEA there are systematic health examinations of newly  
16 settled migrants of some kind.(60) In most eastern European countries and Germany this  
17 health examination is mandatory; while in the rest of western and northern Europe it is  
18 voluntary. All countries that have a policy of health examination aim to identify  
19 communicable diseases, so as to protect the host population. Almost all countries with a  
20 voluntary policy also aim to identify the child's individual health care needs, but this is rarely  
21 the case in countries that have a mandatory policy.  
22  
23  
24  
25  
26  
27

## 28 Discussion

29  
30 Our review of the available evidence indicates that children on the move in Europe have  
31 particular health risks and needs that differ from both the local population as well as  
32 between migrant groups. The body of evidence from Europe remains limited, however, as it  
33 is based primarily on observational studies from individual countries, with few multi-country  
34 or intervention studies. It is important to note that our searches were limited to studies  
35 published in English and listed in the PubMed and EMBASE databases. As such, our searches  
36 may have missed relevant studies published in other languages, in the grey literature, and  
37 studies listed in other databases.  
38  
39  
40  
41

42 A large body of evidence exists on the health needs and risks of children on the move  
43 outside of Europe, most notably in North America and Australia.(50, 61-64) The evidence  
44 from these areas indicates that the health determinants and patterns of risk are similar  
45 across settings; the specific health risks and needs of children are heavily dependent on the  
46 conditions before and during travel and after arrival. There are also patterns that are shared  
47 across high, middle and low income settings, such as children's risk of exposure to violence,  
48 risk of exploitation, and a high risk of mental health problems related to these two  
49 factors.(65) The similarities across regions suggest that, although context plays an important  
50 role for the individual child, there are certain health risks and needs shared by children on  
51 the move across the globe.  
52  
53  
54  
55  
56

57 In light of these similarities, findings from the literature in other parts of the world may help  
58 to fill in some of the existing gaps in the evidence in Europe. For example, there is little good  
59 quality evidence from Europe on the risk of injury during the early period after arrival to the  
60

1  
2  
3 country of destination. However, a large Canadian study found that refugee children have  
4 an increased risk of injury after resettlement. The study reported a 20% higher rate of  
5 unintentional injury in refugee youth compared with non-refugee immigrant youth for most  
6 causes of injury, with notably higher rates of motor vehicle injuries, poisonings, suffocation,  
7 and scald burns.(66) However, to our knowledge, there are no studies that provide data on  
8 the prevalence of disability or its effect on the health and development of children on the  
9 move.  
10  
11  
12

13  
14 There are important contextual factors that are likely to affect the health of children on the  
15 move differently across the world. Basic needs such as clean water, sanitation and food  
16 security may more profoundly influence child health and wellbeing in refugee camps in  
17 developing countries as compared with Europe. Other contextual factors may include the  
18 nature of rights violations, such as the large scale detention and separation of children on  
19 the move from their caregivers in the United States.(67, 68) Studies in Finnish children  
20 separated from their parents for a period during World War II found that these children  
21 exhibited altered stress physiology, earlier menarche, and lower scores on intelligence  
22 testing.(69-71) The detention of children together with their families was demonstrated to  
23 cause significant, quantifiable harm to children in a comparison study from Australia.(72)  
24 The interplay between common or widespread health risks, contextual factors, access to  
25 care, and health promotion activities is likely to play a major role in the ultimate health  
26 outcomes of children on the move in a given geographical area.  
27  
28  
29  
30  
31  
32  
33  
34

35 Newly settled children have greater health needs than the average European child, however  
36 access to health care remains a major obstacle for them. Although there have been very few  
37 studies assessing access to health care by migrant families, it has been proposed that  
38 unfamiliar health care systems, and financial costs of over the counter medications pose  
39 specific challenges to the migrant family.(30) In the UK, UASC have their specific health  
40 needs identified as part of statutory health assessments, where the state has assumed the  
41 role of the corporate parent and undertakes the responsibility for the needs of the child.  
42 However, accompanied children (those children who arrive with and remain in the care of  
43 their migrant, refugee or asylum-seeking parent/s), depend upon their newly arrived  
44 parent(s) to negotiate unfamiliar health care systems.  
45  
46  
47  
48  
49

50 Other important barriers to care in Europe are similar to those found in other settings,  
51 including language barriers, lack of professional medical interpreters, and variable cultural  
52 competence of health personnel. Health workers may lack knowledge or experience in  
53 caring for children on the move, may be unaware of their health rights, and may lack  
54 guidance on the health needs and risks of the newly arrived population. The International  
55 Society for Social Pediatrics and Child Health released a position paper characterising these  
56 barriers and providing recommendations for health policy, health care, research and  
57  
58  
59  
60

1  
2  
3 advocacy.(5) These recommendations are grounded in child rights, and can serve as a guide  
4 for individuals, groups and organisations seeking to improve the health and wellbeing of  
5 children on the move.  
6  
7

8 The main health risks and the main challenge for health services for children on the move in  
9 Europe are in the domain of mental health. A small prospective longitudinal study from  
10 Australia identified modifiable protective factors for refugee children's social and emotional  
11 wellbeing that related to resettlement practices, family factors, and community support.(73)  
12 This review highlights an important knowledge gap in the evidence in Europe for  
13 programmes and policies that address early recognition and intervention, access to care,  
14 and the development of effective preventive services for mental health. There is an urgent  
15 need for research on the effect of interventions and policies intended to promote and  
16 protect the health, wellbeing and positive development of children on the move in Europe  
17  
18  
19

20  
21 The remarkable resilience observed among displaced children has been a topic of significant  
22 discourse and study.(5) Healthy and positive adaptive processes have been associated with  
23 social inclusion, supportive family environments, good caregiver mental health, and positive  
24 school experiences.(44, 74) Although the evidence base for interventions remains limited,  
25 research and experience suggest that the most effective way to protect and promote  
26 refugee child mental health is through comprehensive psychosocial interventions that  
27 address psychological suffering in the context of the child's family and environment; such  
28 interventions necessarily include family, education, and community needs and caregiver  
29 mental health.(75)  
30  
31  
32  
33

### 34 35 36 **Conclusion**

37 Asylum seeking, refugee and undocumented children in Europe have significant health risks  
38 and needs that differ between groups and from children in the local population. Health  
39 policies across EU and EES member states vary widely, and children on the move in Europe  
40 face a broad range of barriers in access to care. The Convention on the Rights of the Child  
41 provides children with the right to access to health care without discrimination and to the  
42 conditions that promote optimal health and wellbeing. With children increasingly on the  
43 move, it is imperative that individuals and sectors that meet and work with these children  
44 are aware of their health risks and needs and are equipped to respond to them.  
45  
46  
47  
48  
49  
50

### 51 **Authors' contributions**

52 The authors collectively identified the need for the paper. Ayesha Kadir designed and  
53 carried out the database searches. Nick Spencer, Anders Hjern and Ayesha Kadir screened  
54 titles and abstracts, and all authors screened full text papers. Ayesha Kadir, Anna Battersby,  
55 and Anders Hjern wrote sections of the first draft. Ayesha Kadir led development and  
56  
57  
58  
59  
60



1  
2  
3 compilation of the first draft and carried out subsequent revisions. All authors contributed  
4 to critical review of the drafts and to the development of the supporting tables and figures.  
5  
6  
7  
8

## 9 **Acknowledgements**

10  
11 The authors would like to thank the ISSOP Migration Working Group, whose work inspired  
12 this review paper.  
13  
14

## 15 **References**

- 16 1. UNHCR. Global Trends: Forced displacement in 2017. Geneva: 2018. Accessed 11 July 2018.  
17 Available from: <http://www.unhcr.org/globaltrends2017/>.
- 18 2. UNICEF. Uprooted: The growing crisis for refugee and migrant children. UNICEF, 2016.  
19 Accessed 20 October 2016. Available from:  
20 <http://www.unicef.org/emergencies/childrenonthemove/uprooted/>.
- 21 3. EUROSTAT. Asylum statistics explained: 2017. 2018. Accessed 13 October 2018 Available  
22 from: [http://ec.europa.eu/eurostat/statistics-explained/index.php/Asylum\\_statistics](http://ec.europa.eu/eurostat/statistics-explained/index.php/Asylum_statistics).
- 23 4. UNHCR, UNICEF, IOM. Refugee and Migrant Children in Europe: Overview of Trends 2017:  
24 UNICEF; 2018. Accessed 13 October 2018. Available from:  
25 [https://www.unicef.org/eca/sites/unicef.org.eca/files/Infographic%20Children%20and%20UASC%20](https://www.unicef.org/eca/sites/unicef.org.eca/files/Infographic%20Children%20and%20UASC%20overview%202017.pdf)  
26 [overview%202017.pdf](https://www.unicef.org/eca/sites/unicef.org.eca/files/Infographic%20Children%20and%20UASC%20overview%202017.pdf).
- 27 5. ISSOP Migration Working Group. ISSOP position statement on migrant child health. *Child*  
28 *Care Health Dev.* 2017;44(1):161-70.
- 29 6. Convention on the Rights of the Child, 1989.
- 30 7. Stubbe Østergaard L, Norredam M, Mock-Munoz de Luna C, et al. Restricted health care  
31 entitlements for child migrants in Europe and Australia. *European Journal of Public Health.*  
32 2017;27(5):869-73.
- 33 8. IOM. International Migration Law: Glossary on Migration. 2004. Accessed 16 March 2017.
- 34 9. Huemer J, Karnik N, Voelkl-Kernstock S, et al. Psychopathology in African unaccompanied  
35 refugee minors in Austria. *Child Psychiatry and Human Development.* 2011;42(3):307-19.
- 36 10. Derluyn I, Broekaert E. Different perspectives on emotional and behavioural problems in  
37 unaccompanied refugee children and adolescents. *Ethnicity and Health.* 2007;12(2):141-62.
- 38 11. Derluyn I, Broekaert E. Unaccompanied refugee children and adolescents: the glaring  
39 contrast between a legal and a psychological perspective. *International Journal of Law and*  
40 *Psychiatry.* 2008;31(4):319-30.
- 41 12. Van Berlaer G, Carbonell FB, Manantsoa S, et al. A refugee camp in the centre of Europe:  
42 Clinical characteristics of asylum seekers arriving in Brussels. *BMJ Open.* 2016;6(11):e013963.
- 43 13. Vervliet M, Lammertyn J, Broekaert E, Derluyn I. Longitudinal follow-up of the mental health  
44 of unaccompanied refugee minors. *European Child and Adolescent Psychiatry.* 2014;23(5):337-46.
- 45 14. Hatleberg CI, Prah J, Rasmussen JN, et al. A review of paediatric tuberculosis in Denmark:  
46 10 year trend, 2000-2009. *European Respiratory Journal.* 2014;43:863-71.
- 47 15. Montgomery E, Foldspang A. Discrimination, mental problems and social adaptation in  
48 young refugees. *European Journal of Public Health.* 2008;18(2):156-61.
- 49 16. Montgomery E. Trauma and resilience in young refugees: a 9-year follow-up study.  
50 *Development and Psychopathology.* 2010;22(2):477-89.



17. Heudorf U, Krackhardt B, Karathana M, Kleinkauf N, Zinn C. Multidrug-resistant bacteria in unaccompanied refugee minors arriving in Frankfurt am Main, Germany, October to November 2015. *Eurosurveillance*. 2016;21(2):pii=30109.
18. Kulla M, Josse F, Stierholz M, et al. Initial assessment and treatment of refugees in the Mediterranean Sea (a secondary data analysis concerning the initial assessment and treatment of 2656 refugees rescued from distress at sea in support of the EUNAVFOR MED relief mission of the EU). *Scandinavian journal of trauma, resuscitation and emergency medicine*. 2016;24:75.
19. Marquardt L, Kramer A, Fischer F, Prufer-Kramer L. Health status and disease burden of unaccompanied asylum-seeking adolescents in Bielefeld, Germany: cross-sectional pilot study. *Tropical Medicine and International Health*. 2016;21(2):210-8.
20. Michaelis K, Wenzel JJ, Stark K, Faber M. Hepatitis A virus infections and outbreaks in asylum seekers arriving to Germany, September 2015 to March 2016. *Emerging Microbes and Infections*. 2017;6(4):e26.
21. Mellou K, Chrisostomou A, Sideroglou T, et al. Hepatitis A among refugees, asylum seekers and migrants living in hosting facilities, Greece, April to December 2016. *Eurosurveillance*. 2017;22(4):30448.
22. Pavlopoulou ID, Tanaka M, Dikalioti S, et al. Clinical and laboratory evaluation of new immigrant and refugee children arriving in Greece. *BMC Pediatrics*. 2017;17(1):132.
23. Ciervo A, Mancini F, di Bernardo F, et al. Louseborne relapsing fever in young migrants, Sicily, Italy, July-September 2015. *Emerging Infectious Diseases*. 2016;22(1):152-3.
24. Bean TM, Eurelings-Bontekoe E, Spinhoven P. Course and predictors of mental health of unaccompanied refugee minors in the Netherlands: One year follow-up. *Social Science and Medicine*. 2007;64(6):1204-15.
25. Seglem KB, Oppedal B, Raeder S. Predictors of depressive symptoms among resettled unaccompanied refugee minors. *Scandinavian Journal of Psychology*. 2011;52(5):457-64.
26. Belhassen-Garcia M, Perez del Villar L, Pardo-Lledias J, et al. Imported transmissible diseases in minors coming to Spain from low-income areas. *Clinical Microbiology and Infection*. 2015;21(4):370.e5-.e8.
27. Bennet R, Eriksson M. Tuberculosis infection and disease in the 2015 cohort of unaccompanied minors seeking asylum in Northern Stockholm, Sweden. *Infectious Diseases*. 2017;49(7):501-6.
28. Hjern A, Rajmil L, Bergstrom M, et al. Migrant density and well-being-a national school survey of 15-year-olds in Sweden. *European Journal of Public Health*. 2013;23(5):823-8.
29. Riddell R. Seeking Refuge: Unaccompanied Childre in Sweden. Human Rights Watch, 2016. Accessed 19 July 2018. Available from: [https://www.hrw.org/sites/default/files/report\\_pdf/sweden0616web\\_1.pdf](https://www.hrw.org/sites/default/files/report_pdf/sweden0616web_1.pdf).
30. Alkahtani S, Cherrill J, Millward C, et al. Access to medicines by child refugees in the east midlands region of England: A cross-sectional study. *BMJ Open*. 2014;4(12):e006421.
31. Bronstein I, Montgomery P, Dobrowolski S. PTSD in asylum-seeking male adolescents from Afghanistan. *Journal of Traumatic Stress*. 2012;25(5):551-7.
32. Bronstein I, Montgomery P, Ott E. Emotional and behavioural problems amongst Afghan unaccompanied asylum-seeking children: results from a large-scale cross-sectional study. *European Child and Adolescent Psychiatry*. 2013;22(5):285-94.
33. Hodes M, Jagdev D, Chandra N, Cunniff A. Risk and resilience for psychological distress amongst unaccompanied asylum seeking adolescents. *Journal of Child Psychology and Psychiatry and Allied Disciplines*. 2008;49(7):723-32.
34. Baillot H, Murray N, Connelly E, Howard N. Addressing female genital mutilation in Europe: a scoping review of approaches to participation, prevention, protection, and provision of services. *International Journal for Equity in Health*. 2018;17(1):21.

- 1
- 2
- 3 35. Odone A, Tillmann T, Sandgren A, et al. Tuberculosis among migrant populations in the
- 4 European Union and the European Economic Area. *The European Journal of Public Health.*
- 5 2015;25(3):506-12.
- 6
- 7 36. Villadsen SF, Sievers E, Andersen AM, et al. Cross-country variation in stillbirth and neonatal
- 8 mortality in offspring of Turkish migrants in northern Europe. *European Journal of Public Health.*
- 9 2010;20(5):530-5.
- 10
- 11 37. Williams GA, Bacci S, Shadwick R, et al. Measles among migrants in the European Union and
- 12 the European Economic Area. *Scandinavian Journal of Public Health.* 2016;44(1):6-13.
- 13
- 14 38. Hjern A, Ostergaard LS, Norredam M, de Luna CMM, Goldfeld S. Health policies for migrant
- 15 children in Europe and Australia. *The Lancet.* 2017;389(10066):249.
- 16
- 17 39. Aynsley-Green A, Cole TJ, Crawley H, et al. Medical, statistical, ethical and human rights
- 18 considerations in the assessment of age in children and young people subject to immigration
- 19 control. *British Medical Bulletin.* 2012;102:17-42.
- 20
- 21 40. Bollini P, Pampallona S, Wanner P, Kupelnick B. Pregnancy outcome of migrant women and
- 22 integration policy: A systematic review of the international literature. *Social Science & Medicine.*
- 23 2009;68(3):452-61.
- 24
- 25 41. Cole TJ. The evidential value of developmental age imaging for assessing age of majority.
- 26 *Annals of Human Biology.* 2015;42(4):379-88.
- 27
- 28 42. Devi S. Unaccompanied migrant children at risk across Europe. *Lancet.*
- 29 2016;387(10038):2590.
- 30
- 31 43. Eiset AH, Wejse C. Review of infectious diseases in refugees and asylum seekers—current
- 32 status and going forward. *Public Health Reviews.* 2017;38:22.
- 33
- 34 44. Fazel M, Reed RV, Panter-Brick C, Stein A. Mental health of displaced and refugee children
- 35 resettled in high-income countries: risk and protective factors. *Lancet.* 2012;379(9812):266-82.
- 36
- 37 45. Hjern A, Ascher H, Vervliet M. Age assessment of young asylum seekers – science or
- 38 deterrence? In: Semovilla D, editor. *Handbook of research with unaccompanied children. In press.*
- 39
- 40 46. Markkula N, Cabieses B, Lehti V, et al. Use of health services among international migrant
- 41 children – a systematic review. *Globalization and Health.* 2018;14:52.
- 42
- 43 47. Mipatrini D, Stefanelli P, Severoni S, Rezza G. Vaccinations in migrants and refugees: a
- 44 challenge for European health systems. A systematic review of current scientific evidence.
- 45 *Pathogens and Global Health.* 2017;111(2):59-68.
- 46
- 47 48. Sauer PJ, Nicholson A, Neubauer D, Advocacy and Ethics Group of the European Academy of
- 48 Paediatrics. Age determination in asylum seekers: physicians should not be implicated. *European*
- 49 *Journal of Pediatrics.* 2016;175(3):299-303.
- 50
- 51 49. Slone M, Mann S. Effects of War, Terrorism and Armed Conflict on Young Children: A
- 52 Systematic Review. *Child Psychiatry and Human Development.* 2016;47(6):950-65.
- 53
- 54 50. Williams B, Cassar C, Siggers G, Taylor S. Medical and social issues of child refugees in
- 55 Europe. *Arch Dis Child.* 2016;101(9):839-42.
- 56
- 57 51. Noori T. Assessing the burden of key infectious diseases affecting migrant populations in the
- 58 EU/EEA. Stockholm: European Centre for Disease Prevention and Control, 2014. Accessed 8 June
- 59 2018. Available from:
- 60 <https://ecdc.europa.eu/sites/portal/files/media/en/publications/Publications/assessing-burden-disease-migrant-populations.pdf>.
- 52 52. World Health Organization. Migration and communicable diseases: no systematic
- association. Copenhagen, 2017. Accessed 8 June 2018. Available from:
- <http://www.euro.who.int/en/health-topics/health-determinants/migration-and-health/migrant-health-in-the-european-region/migration-and-health-key-issues#292117>.
- 53 53. UNICEF. Refugee and Migrant Crisis in Europe: Humanitarian Situation Report No. 28.
- Accessed 16 August 2018. Available from:
- <https://www.unicef.org/eca/sites/unicef.org.eca/files/sitreprandm.pdf>.

- 1  
2  
3 54. Keygnaert I, Ivanova O, Guieu A, et al. What is the Evidence on the Reduction of Inequalities  
4 in Accessibility and Quality of Maternal Health Care Delivery for Migrants? A Review of the Existing  
5 Evidence in the WHO European Region. Copenhagen: World Health Organization; 2016.
- 6 55. IOM, UNICEF. Data Brief: Migration of Children to Europe 2015. Accessed 5 December 2016.  
7 Available from: [http://www.iom.int/sites/default/files/press\\_release/file/IOM-UNICEF-Data-Brief-  
8 Refugee-and-Migrant-Crisis-in-Europe-30.11.15.pdf](http://www.iom.int/sites/default/files/press_release/file/IOM-UNICEF-Data-Brief-Refugee-and-Migrant-Crisis-in-Europe-30.11.15.pdf).
- 9 56. EUROSTAT. Asylum applicants considered to be unaccompanied minors 2017. Accessed 19  
10 November 2018. Available from:  
11 [http://appsso.eurostat.ec.europa.eu/nui/show.do?dataset=migr\\_asyunaa&lang=en](http://appsso.eurostat.ec.europa.eu/nui/show.do?dataset=migr_asyunaa&lang=en) . .
- 12 57. Derluyn I, Broekaert E, Schuyten G. Emotional and behavioural problems in migrant  
13 adolescents in Belgium. *European Child and Adolescent Psychiatry*. 2008;17(1):54-62.
- 14 58. Busler D, Cowell K, Johnson H, Kane J. Age Assessment Guidance: Guidance to assist social  
15 workers and their managers in undertaking age assessments in England. Association of Directors of  
16 Children's Services, 2015. Accessed 13 October 2018. Available from:  
17 [http://adcs.org.uk/assets/documentation/Age\\_Assessment\\_Guidance\\_2015\\_Final.pdf](http://adcs.org.uk/assets/documentation/Age_Assessment_Guidance_2015_Final.pdf).
- 18 59. European Asylum Support Office. Age assessment practice in Europe. European Asylum  
19 Support Office, 2014. Accessed 1 March 2017. Available from:  
20 [https://www.easo.europa.eu/sites/default/files/public/EASO-Age-assessment-practice-in-  
21 Europe1.pdf](https://www.easo.europa.eu/sites/default/files/public/EASO-Age-assessment-practice-in-Europe1.pdf).
- 22 60. Hjern A, Stubbe-Østergaard L. Migrant children in Europe: Entitlements to health care.  
23 London: EU Commission, 2016. Available from: [http://www.childhealthservicemodels.eu/wp-  
24 content/uploads/2015/09/20160831\\_Deliverable-D3-D7.1\\_Migrant-children-in-Europe.pdf](http://www.childhealthservicemodels.eu/wp-content/uploads/2015/09/20160831_Deliverable-D3-D7.1_Migrant-children-in-Europe.pdf).
- 25 61. Chilton LA, Handal GA, Paz-Soldan GJ, Council on Community Pediatrics. Providing care for  
26 immigrant, migrant, and border children. *Pediatrics*. 2013;131(6):e2028-e34.
- 27 62. Pottie K, Greenaway C, Feightner J, et al. Evidence-based clinical guidelines for immigrants  
28 and refugees. *Canadian Medical Association Journal*. 2011;183(12):e824-e925.
- 29 63. Foundation House. Promoting Refugee Health: A guide for doctors, nurses and other health  
30 care providers caring for people from refugee backgrounds. 3rd ed. Melbourne: Foundation House;  
31 2012.
- 32 64. Zwi K, Woodland L, Mares S, et al. Helping refugee children thrive: what we know and where  
33 to next. *Arch Dis Child*. 2018;103(6):529-32.
- 34 65. Reed RV, Fazel M, Jones L, Panter-Brick C, Stein A. Mental health of displaced and refugee  
35 children resettled in low-income and middle-income countries: risk and protective factors. *Lancet*.  
36 2012;379(9812):250-65.
- 37 66. Saunders NR, Macpherson A, Guan J, Guttman A. Unintentional injuries among refugee and  
38 immigrant children and youth in Ontario, Canada: a population-based cross-sectional study. *Injury  
39 Prevention*. 2017;24(5):337-43.
- 40 67. Linton JM, Griffin M, Shapiro AJ. Detention of Immigrant Children. *Pediatrics*.  
41 2017;139(5):pii: e20170483.
- 42 68. Kraft C. AAP Statement on Executive Order on Family Separation: American Academy of  
43 Pediatrics; 2018. Accessed 8 October 2018. Available from: [https://www.aap.org/en-us/about-the-  
44 aap/aap-press-room/Pages/AAP-Statement-on-Executive-Order-on-Family-Separation.aspx](https://www.aap.org/en-us/about-the-aap/aap-press-room/Pages/AAP-Statement-on-Executive-Order-on-Family-Separation.aspx).
- 45 69. Pesonen AK, Raikkonen K, Feldt K, et al. Childhood separation experience predicts HPA axis  
46 hormonal responses in late adulthood: a natural experiment of World War II.  
47 *Psychoneuroendocrinology*. 2010;35(5):758-67.
- 48 70. Pesonen AK, Raikkonen K, Heinonen K, et al. Reproductive traits following a parent-child  
49 separation trauma during childhood: a natural experiment during World War II. *American Journal of  
50 Human Biology*. 2008;20(3):345-51.
- 51 71. Pesonen A-K, Räikkönen K, Kajantie E, et al. Intellectual ability in young men separated  
52 temporarily from their parents in childhood. *Intelligence*. 2011;39(5):335-41.
- 53  
54  
55  
56  
57  
58  
59  
60

- 1  
2  
3 72. Zwi K, Mares S, Nathanson D, Tay AK, Silove D. The impact of detention on the social-  
4 emotional wellbeing of children seeking asylum: a comparison with community-based children. *Eur*  
5 *Child Adolesc Psychiatry*. 2018;27(4):411-22.  
6  
7 73. Zwi K, Woodland L, Williams K, et al. Protective factors for social-emotional well-being of  
8 refugee children in the first three years of settlement in Australia. *Arch Dis Child*. 2018;103(3):261-8.  
9 74. Betancourt TS, Khan KT. The mental health of children affected by armed conflict: protective  
10 processes and pathways to resilience. *International Review of Psychiatry*. 2008;20(3):317-28.  
11 75. Fazel M, Betancourt TS. Preventive mental health interventions for refugee children and  
12 adolescents in high-income settings. *The Lancet Child & Adolescent Health*. 2018;2(2):121-32.  
13  
14  
15  
16  
17  
18  
19  
20  
21  
22  
23  
24  
25  
26  
27  
28  
29  
30  
31  
32  
33  
34  
35  
36  
37  
38  
39  
40  
41  
42  
43  
44  
45  
46  
47  
48  
49  
50  
51  
52  
53  
54  
55  
56  
57  
58  
59  
60

1  
2  
3  
4  
5  
6  
7  
8  
9  
10  
11  
12  
13  
14  
15  
16  
17  
18  
19  
20  
21  
22  
23  
24  
25  
26  
27  
28  
29  
30  
31  
32  
33  
34  
35  
36  
37  
38  
39  
40  
41  
42  
43  
44  
45  
46  
47  
48  
49  
50  
51  
52  
53  
54  
55  
56  
57  
58  
59  
60

Identification  
Screening  
Eligibility  
Included

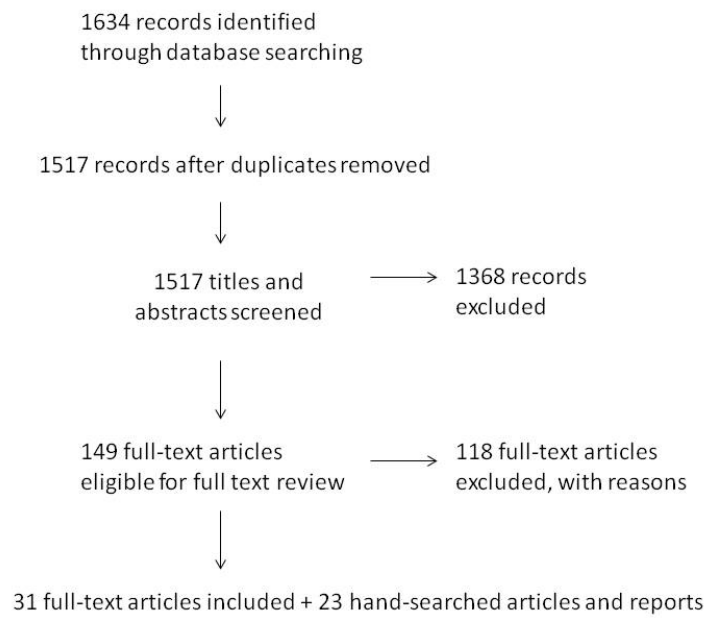

254x190mm (96 x 96 DPI)
